1 **CRISPR/Cas9 targeting of an oncogenic KRAS mutant allele induces**  
2 **efficient tumor regression**

3 **Qianqian Gao<sup>1,2,3\*</sup>, Wenjie Ouyang<sup>1,2,3\*</sup>, Bin Kang<sup>1,2,3\*</sup>, Xu Han<sup>1,2,3\*</sup>, Ying Xiong<sup>4\*</sup>, Rengeng**  
4 **Ding<sup>1,2,3,5</sup>, Yijian Li<sup>1,2,3</sup>, Fei Wang<sup>1,2,3,5</sup>, Lei Huang<sup>1,2,3,5</sup>, Lei Chen<sup>1,2,3</sup>, Dan Wang<sup>1,2,3</sup>, Xuan**  
5 **Dong<sup>1,2,3</sup>, Zhao Zhang<sup>1,2,3</sup>, Yanshan Li<sup>1,2,3</sup>, Baichen Ze<sup>1,2,3</sup>, Yong Hou<sup>1,2,3</sup>, Huanming Yang<sup>1,2,3,6</sup>,**  
6 **Yuanyuan Ma<sup>4#</sup>, Ying Gu<sup>1,2,3#</sup>, Cheng-chi Chao<sup>1,2,3,7#</sup>**

7 <sup>1</sup> Guangdong Provincial Key Laboratory of Genome Read and Write, BGI-Shenzhen, Shenzhen  
8 518083, China;

9 <sup>2</sup> China National GeneBank, BGI-Shenzhen, Jinsha Road, Shenzhen 518120, China;

10 <sup>3</sup> Guangdong Provincial Academician Workstation of BGI Synthetic Genomics, BGI-Shenzhen,  
11 Shenzhen, 518083, China;

12 <sup>4</sup> Department of Thoracic Surgery II, Key Laboratory of Carcinogenesis and Translational  
13 Research (Ministry of Education/Beijing), Peking University Cancer Hospital and Institute,  
14 Beijing, China;

15 <sup>5</sup> BGI Education Center, University of Chinese Academy of Sciences, Shenzhen, 518083, China;

16 <sup>6</sup> James D. Watson Institute of Genome Sciences, Hangzhou 310058, China;

17 <sup>7</sup> Ab Vision, Inc, Milpitas, California, USA.

18 \* These authors contributed equally to this work.

19 #Correspondence: Yuanyuan Ma ([mayynmg@aliyun.com](mailto:mayynmg@aliyun.com)), Huanming Yang ([yanghuanming@genomics.cn](mailto:yanghuanming@genomics.cn)),

20 Ying Gu ([guying@cngb.org](mailto:guying@cngb.org)); Cheng-chi Chao ([chengchic@abvisioninc.com](mailto:chengchic@abvisioninc.com)).

## 21 **Abstract**

22 **Background:** *KRAS* is one of the most frequently mutated oncogenes in human cancers, but  
23 its activating mutations have remained undruggable due to its picomolar affinity for GTP/GDP and  
24 its smooth protein structure resulting in the absence of known allosteric regulatory sites.

25 **Results:** With the goal of treating mutated *KRAS*-driven cancers, in addition to CRISPR-  
26 SpCas9 genome-editing system, transcription-regulating system dCas9-KRAB, which binds to  
27 target sequence by dCas9 and downregulate mRNA transcription by transcriptional repressor KRAB,  
28 were developed to directly deplete *KRAS* mutant allele or to repress its transcription in cancer cells,  
29 respectively, through guide RNA specifically targeting the mutant allele but not the wild-type allele.  
30 The in vitro proliferation and cell cycle of cancer cells as well as in vivo tumor growth were  
31 examined after delivery of Cas9 system. SpCas9 and dCas9-KRAB systems with sgRNA targeting  
32 the mutant allele both blocked the expression of mutant *KRAS* gene, leading to inhibition of cancer  
33 cell proliferation. Local injections of both SpCas9 and dCas9-KRAB systems suppressed tumor  
34 growth in vivo, with the gene-depletion system performing more effectively than the transcription-  
35 suppressing system on tumor inhibition. Application of both Cas9 systems to wild-type *KRAS* tumor  
36 cells did not affect cell proliferation both in vitro and in vivo. Further-more, through bioinformatic  
37 analysis of 31555 SNP mutations of the top 20 cancer driver genes, we showed that our mutant-  
38 specific editing strategy can be extended to a list of oncogenic mutations with high editing potentials,  
39 and this pipeline can be applied to analyze the distribution of PAM sequence in the genome to survey  
40 the best targets for other editing purpose.

41 **Conclusions:** We successfully developed both gene-depletion and transcription-suppressing

42 systems to specifically target an oncogenic mutant allele of KRAS and lead to significant tumor

43 regression, providing a promising strategy for the treatment of tumors with driver gene mutations.

44 **Keywords:** KRAS, CRISPR-Cas9, dCas9-KRAB, gene-editing, mRNA-regulating,

45 oncogenic mutation, bioinformatic pipeline

## 46 Background

47 High frequency of *RAS* mutations has been found in various types of human cancers, including

48 colon<sup>1,2</sup>, lung<sup>3</sup> and pancreatic<sup>4</sup> cancers which are the most deadly malignancies around the world<sup>5</sup>.

49 The three *RAS* oncogenes including *NRAS*, *HRAS* and *KRAS* make up the most frequently mutated

50 gene family in human cancers. *KRAS* mutation is the most prevalent (21%) among the three genes,

51 while the other two are 3% and 8% for *NRAS* and *HRAS*, respectively<sup>6</sup>.

52 *KRAS* is predominantly mutated in pancreatic ductal adenocarcinomas (PDACs), colorectal

53 adenocarcinomas (CRCs) and lung adenocarcinomas (LACs)<sup>7</sup>. Majority of oncogenic *KRAS*

54 mutations occur at codon 12, 13, and 61. G12 mutations are the most common variations (83%). It

55 was reported that KRAS G12S is present in 1.84% of all colorectal adenocarcinoma patients, while

56 in non-small cell lung carcinoma the frequency is 0.5%<sup>8</sup> (Table 1).

57 Table 1 Occurrence of KRAS G12S mutation in different diseases

| Diseases                      | Occurrence of KRAS G12S (%) |
|-------------------------------|-----------------------------|
| Rectal Carcinoma              | 2.56                        |
| Colorectal Adenocarcinoma     | 1.84                        |
| Colorectal Carcinoma          | 1.66                        |
| Non-Small Cell Lung Carcinoma | 0.5                         |
| Squamous Cell Lung Carcinoma  | 0.23                        |
| Myelodysplastic Syndromes     | 0.19                        |
| Acute Myeloid Leukemia        | 0.14                        |

58 Comprehensive efforts have been stimulated to develop therapeutic strategies to halt mutant

59 *KRAS* function for cancer treatment, based on the well validated role of mutation-induced activation  
60 of *KRAS* in driving cancer development and growth. Different strategies to inhibit *KRAS* signaling  
61 are under investigation, including exploring direct *KRAS*-binding molecules, targeting proteins that  
62 facilitate *KRAS* membrane association or downstream signaling, searching for synthetic lethal  
63 interactors, and novel ways of inhibiting *KRAS* gene expression and harnessing the immune  
64 system<sup>9,10</sup>. However, after more than three decades of research efforts, there is still seldom clinically  
65 effective anti-*KRAS* therapy.

66 The various studies to block *RAS* pathway have demonstrated the necessity to pursue mutation-  
67 specific *RAS*-targeted strategies. Small molecules that selectively bind to the *KRAS* G12C mutant  
68 were reported but only examined in cellular level<sup>11</sup>. Gray *et al.* have also targeted *KRAS*-G12C by  
69 a GDP analogue which could covalently bind to the cysteine of G12C mutant, yet with a limitation  
70 to penetrate into cells<sup>12</sup>. Synthetic lethal interactors have also been screened in G13D<sup>13,14</sup> or Q61K<sup>15</sup>  
71 mutant cell lines to specifically target cancer cells, but with a far distance to be clinically applied.  
72 Despite the various attempts to directly interfere *KRAS* published previously, *KRAS* targeting still  
73 remains very challenging due to its protein structure, which lacks suitable binding pocket for small  
74 molecule inhibitors<sup>10</sup>.

75 Development of antibodies and small molecule inhibitors is money and time consumptive.  
76 Besides, owing to the uniqueness, the antibody and inhibitor can only be used to alter one specific  
77 target. Compared to the traditional antibody or inhibitor, genome editing technology will be a better  
78 alternative to flexibly manipulate biological activity of molecules at DNA level. CRISPR (Clustered  
79 regularly interspaced short palindromic repeats)/SpCas9 (CRISPR associated protein 9) system,  
80 developed from *Streptococcus pyogenes*, recognizes specific DNA sequences and is widely applied

81 to genome editing of mammalian cells<sup>16,17</sup>. Taeyoung Koo *et al.* has used CRISPR/Cas9 to target an  
82 epidermal growth factor receptor (*EGFR*) oncogene harboring a single-nucleotide missense  
83 mutation to enhance cancer cell killing<sup>18</sup>, while Zhang-Hui Chen *et al.* targeted genomic  
84 rearrangements in tumor cells through insertion of a suicide gene by Cas9<sup>19</sup>. They have proved the  
85 concept of disrupting mutant tumor cells specifically by CRISPR/Cas9. *KRAS* mutant alleles  
86 including G12V, G12D and G13D, have also been targeted by CRISPR/Cas9 system to control  
87 tumor growth<sup>20,21</sup>. In addition, CRISPR-Cas13a system was engineered for targeted therapy of  
88 *KRAS*-G12D and *KRAS*-G12C mutants in pancreatic cancer<sup>22</sup>. The above three *KRAS* mutant  
89 alleles become druggable by using CRISPR/Cas9 genome-editing system. However, G12S mutation,  
90 a prevalent mutation in colorectal adenocarcinoma, has not been targeted by CRISPR system until  
91 now.

92 Here we demonstrated G12S mutant allele, but not the wild type *KRAS* can be specifically  
93 targeted by CRISPR-SpCas9 system. The delivery of SpCas9 and a guide RNA targeting G12S  
94 mutant allele in cancer cells affected the *in vitro* proliferative ability and cell cycle of tumor cells,  
95 and the *in vivo* tumor growth. In addition to genome-editing CRISPR-SpCas9 system, transcription-  
96 regulating dCas9-KRAB (dead Cas9, dCas9; the Krüppel associated box, KRAB) systems were  
97 harnessed to inhibit tumor growth, but not comparable to the genome-editing system. The specific  
98 CRISPR targeting sites of 31555 oncogenic mutations of top 20 cancer driver genes had been  
99 screened using our high-throughput bioinformatics analysis, which facilitated the application of  
100 genome editing strategy to other cancer mutations. To the best of our knowledge, our study is the  
101 first to target *KRAS*-G12S mutant by CRISPR/Cas9 and dCas9-KRAB systems for inhibition of  
102 tumor growth. Moreover, our bioinformatic pipeline for analyzing the distribution of protospacer

103 adjacent motif (PAM) sequence provided a useful tool for editing targets screening. Combined with  
104 next generation sequencing (NGS), the genome-editing approach would be a promising strategy for  
105 targeting KRAS or other oncogenic mutations for personalized cancer treatment.

## 106 **Methods**

### 107 **Cell lines and cell culture**

108 HEK293T cells (ATCC, CRL-11268) were purchased from the American Type Culture Collection  
109 (ATCC). HEK293T cells were cultured in Dulbecco's modified Eagle's medium (DMEM, Gibco,  
110 21063029) supplemented with 10% fetal bovine serum (Hyclone, SH30084.03HI), penicillin (100  
111 IU/ml), and streptomycin (50 µg/ml). A549 and H2228 cell lines were purchased from Shanghai  
112 Cellbank, China. And they were cultured in RPMI-1640 medium (Gibco, C22400500BT)  
113 supplemented with 10% fetal bovine serum (Hyclone, SH30084.03HI), penicillin (100 IU/ml), and  
114 streptomycin (50 µg/ml).

### 115 **Plasmid construction**

116 pX330-U6-Chimeric vector (Addgene, #42230) and lentiCRISPR v2 plasmidwith puromycin-  
117 resistance (Addgene, #52961) were purchased from Addgene. For sgRNA expression,  
118 oligonucleotides containing each target sequence were synthesized (BGI), followed by annealing in  
119 a thermocycler. Annealed oligonucleotides were ligated into the lentiCRISPR v2 plasmid digested  
120 with Bsm BI (Supplemental Figure S1).

## 121 **Lentivirus production**

122 HEK293T cells were seeded at 70-80% confluency on 100 mm dishes. One day after seeding, the  
123 cells were transfected with a mixture (18µg) of transfer plasmid (empty lentiCRISPR v2 or  
124 lentiCRISPR v2 containing sgRNA), psPAX2 (Addgene, #12260), and pMD2.G (Addgene, #12259)  
125 at a weight ratio of 4:3:2 using 54µL PEI (Polysciences, 24765-1, 1µg/µl). We changed the medium  
126 after 4-6 hours of incubation at 37 °C and 5% CO<sub>2</sub>. Viral supernatants were collected 72 hours after  
127 transfection and filtered through a 0.45-µm filter (Millipore, SLHP033RB), and ultra-centrifuged  
128 for 1.5 h at 35,000 rpm (TYPE 45 Ti rotor of Beckman) at 4°C to concentrate the virus. The resulting  
129 pellet was then re-suspended in RPMI1640 medium without FBS, and stored at -80 °C. The  
130 lentiviral titers were determined with a Lenti-X™ qRT-PCR Titration Kit (Clontech).

## 131 **Cell transfection**

132 A549 and H2228 cells were seeded at 70% confluency on six-well plate. One day after seeding, the  
133 cells were transfected with 3µg target plasmid (empty lentiCRISPR v2 or lentiCRISPR v2  
134 containing sgRNA), using 9µL PEI. This medium was replaced with fresh culture medium 24 hours  
135 after transfection, and the cultures were supplemented with 2 µg/ml puromycin (ant-pr, InvivoGen)  
136 and incubated at 37 °C and 5% CO<sub>2</sub>.

137

## 138 **In vitro lentiviral transduction**

139 For viral infection, A549 and H2228 cells were seeded into six-well plates at  $1 \times 10^5$  cells/well in  
140 the presence of 10 µg/ml polybrene and incubated with virus-containing medium. This medium was

141 replaced with fresh culture medium 24 hours after infection, and the cultures were supplemented  
142 with 2 µg/ml puromycin (ant-pr, InvivoGen) and incubating for 48 h. Subsequently, the double-  
143 transduced cells were counted and subjected to other assays.

## 144 **T7E1 assay**

145 Genomic DNA was isolated using the Genomic DNA Kit (Tiangen, #DP304-03) according to the  
146 manufacturer's instructions. The region of DNA containing the nuclease target site was amplified  
147 by PCR with the following primers: KRAS forward, 5'- atgcattttcttaagcgtcgtatgg-3'; KRAS  
148 reverse, 5'-ccctgacatactccaagaaag-3'. The PCR amplification was performed according to the  
149 following protocol: 2 min at 94 °C; 30 cycles of (10 s at 98 °C, 30 s at 56 °C, 25 s at 68 °C). After  
150 separation on a 2% agarose gel, size-selected products were purified using QIAquick Gel  
151 Extraction Kit (QIAGEN, 28706). The purified PCR products were denatured by heating and  
152 annealed to form heteroduplex DNA, and then treated with 5 units of T7 endonuclease 1 (New  
153 England Biolabs) for 30 min at 37°C and finally analyzed by 2% agarose gel electrophoresis.

## 154 **RNA extraction and qPCR**

155 Total RNA was isolated from cells using TRIzol LS reagent (Invitrogen, 10296028) following the  
156 manufacturer's protocol. One microgram of RNA was then reverse transcribed using Primescript  
157 RT Reagent (Takara, RR047A). Quantitative PCR was performed using Fast Sybr Green Master mix  
158 (Applied Biosystems) and the used primers are: KRAS forward, 5'- atgcattttcttaagcgtcgtatgg-3';  
159 KRAS reverse, 5'-ccctgacatactccaagaaag-3'. Each messenger RNA (mRNA) level was measured  
160 as a fluorescent signal normalized based on the signal for glyceraldehyde 3-phosphate  
161 dehydrogenase (GAPDH). Relative quantification was determined by the  $\Delta\Delta C_t$  method and



162 normalized according to GAPDH.

## 163 **Cell proliferation assay and cell cycle analysis**

164 Cells were seeded in 96-well plates at  $1 \times 10^3$  per well in 90  $\mu$ L cell medium. Cell proliferation was  
165 accessed by Cell Counting Kit-8 (YEASEN, 40203ES80) according to the manufacturer's  
166 instructions. Briefly, 10  $\mu$ L of CCK-8 solution was added to cell culture and then incubated for 3-4  
167 h. Check the absorbance at 450 nm wave length and cell proliferation was evaluated according to it.  
168 For analyzing cell cycle, cells were plated in six-well plates at  $6 \times 10^5$  per well. After staining by  
169 propidium iodide (Sigma–Aldrich), the cell cycle distribution was analyzed by flow cytometry.

## 170 **Colony formation assay**

171 A549 and H2228 cells were plated in six-well plates at  $2 \times 10^2$  per well and maintained in RPMI1640  
172 medium supplemented 10% FBS. After 2 weeks, the cells were washed once with PBS, fixed with  
173 cold methanol for 10min, and then stained with 0.5% Crystal violet. The number of colonies was  
174 calculated by ImageJ. All these experiments were performed in triplicates.

## 175 **Western blot analysis**

176 A549 and H2228 cells were plated in six-well plates at a confluent of 70%. 48h after adenovirus  
177 infection, whole-cell extracts were prepared by lysing cells with adding 500  $\mu$ L hot SDS-PAGE  
178 buffer (P0015B, Beyotime). Tumor tissues were homogenized by TGrinder (OSE-Y30, Tiangen),  
179 and lysed with RIPA buffer containing complete protease inhibitor cocktail (Roche). Target proteins  
180 were detected by western blot analysis with the antibodies as follows: GAPDH mouse monoclonal  
181 antibody (60004-1-Ig, Proteintech), Akt (pan) (40D4) mouse monoclonal antibody (2920, Cell

182 Signaling), Phospho-Akt (Ser473) (D9E) XP Rabbit mAb (4060, Cell Signaling), p44/42 MAPK  
183 (Erk1/2) (137F5) Rabbit mAb (4695, Cell Signaling), Phospho-p44/42 MAPK (Erk1/2)  
184 (Thr202/Tyr204) (D13.14.4E) (4370, Cell Signaling), mouse monoclonal Anti-MAP Kinase,  
185 activated (Diphosphorylated ERK-1&2) antibody (M8159, Sigma), Ras Antibody (#3965, Cell  
186 Signaling) and Anti-RAS (G12S) Mouse Monoclonal Antibody (26186, NewEast).

## 187 **Generation, treatment and analysis of tumor xenografted** 188 **mice**

189 Xenograft mouse model of human lung cancer tumors were implanted under the left upper limb in  
190 the abdomens of 6- to 8-week old male NCG mice by subcutaneous injection of A549 ( $5 \times 10^6$  cells  
191 in 200 uL DPBS (Gibco, C14190500BT)) or H2228 cells ( $2 \times 10^6$  cells in 200 uL DPBS). After  
192 tumor cell injection, when tumor volumes reached a range of 50–100 mm<sup>3</sup>, mice were randomly  
193 separated to one of five groups to receive PBS, AdV-Cas9, AdV-Cas9-sgG12S, Lenti-v2, or dCas9-  
194 KRAB-sgG12S (nine mice per group). The first day of treatment was designated as day 1. PBS,  
195 Adenovirus ( $1 \times 10^9$  PFU in 10 uL DPBS), or lentivirus ( $5 \times 10^{10}$  copies in 70 uL DPBS ) was  
196 administered intratumorally on day 1, 4 and 7. Tumor growth inhibition was evaluated twice a week  
197 by measuring the length (L) and width (w) of the tumor. Tumor volume was determined using the  
198 following formula:  $\text{volume} = 0.523L(w)^2$ .

## 199 **H&E staining**

200 Formalin-fixed and paraffin-embedded tumor tissues were cut into sections and stained with  
201 hematoxylin and eosin (H&E). Histopathology was reviewed by an experienced pathologist.

## 202 **IHC staining**

203 Tumor tissues were formalin-fixed, paraffin-embedded and stained using anti-RAS (G12S) mouse  
204 monoclonal antibody (26186, NewEast) followed by incubation with HRP-conjugated  
205 corresponding secondary antibody (Sigma-Aldrich). The expression levels were evaluated by H-  
206 score method. Scoring was independently reviewed in parallel by two experienced pathologists.

## 207 **Analysis of off-target effects**

208 Paired-end reads of each sample were aligned against the sequence of each off-target locus (~150bp)  
209 using BWA-MEM<sup>23</sup> (version 0.7). The mapped reads for each off-target locus were then obtained  
210 from the alignment result. Mapped reads number (M) for each off-target locus could be got by using  
211 SAMtools idxstats module<sup>24,25</sup>. By applying a tool called FLASH<sup>26</sup>, the mapped paired-end reads  
212 were merged. By using regular expression to search the sequences of off-targets' protospacers and  
213 their reverse complementarity sequence in the above merged read files, the number of protospacers  
214 (S) among the mapped reads could be obtained. The editing efficiency for a off-target could be  
215 obtained via the following equation:

$$216 \quad \textit{Editing Efficiency} = 1 - \frac{S}{M}$$

## 217 **PAM analysis**

218 Annotate and prioritize genomic variants based on previous report<sup>27</sup>. Briefly, use ANNOVAR<sup>28</sup> to  
219 annotate COSMIC v88 mutation database (perl table\_annoar.pl humandb/hg19\_cosmic88.txt  
220 humandb/ -buildver hg19 -out cosmic -remove -protocol refGene -operation gx -nastring . -csvout),  
221 and select variants located in the exons of the 20 cancer driver genes. Based on the gene mutation

222 and wild-type genome information ([https://www.ncbi.nlm.nih.gov/assembly/GCF\\_000001405.25](https://www.ncbi.nlm.nih.gov/assembly/GCF_000001405.25)),  
223 we applied Pandas (<https://pandas.pydata.org/>), a python package, to analyze the COSMIC SNP  
224 mutation information to generate a data frame. We applied Pyfaidx<sup>29</sup>, a python package to extract  
225 specific sequences from the GRCh37.p13 reference genome. PAM sequences of SpCas9, SaCas9,  
226 and LbCpf1 CRISPR nucleases were analyzed in the GRCh37.p13 reference genome. Once the SNP  
227 mutation is in the seed region of PAM sequences, we consider it can be edited by CRISPR nucleases.

## 228 **Statistical analysis**

229 Significance of all data was determined using two-tailed Student's t-test, and p-values <0.05 were  
230 considered statistically significant.

## 231 **Results**

### 232 **Cas9-sgG12S specifically targets KRAS mutant alleles**

233 *KRAS* gene locates in the short arm of human chromosome 12. There are four dominant mutant  
234 alleles at G12 position in exon 1, G12S (c.34G>A), G12V (c.35G>T), G12C (c.34G>T) and G12D  
235 (c.35G>A) (Figure 1A). These single nucleotide missense mutations are next to a PAM (TGG)  
236 sequence recognized by SpCas9. Since variations of DNA base in the PAM or seed sequence affect  
237 the recognition of SpCas9, five sgRNAs in total were generated to target the *KRAS*-WT gene (single  
238 guide G12-wild type RNA, sgG12-WT), and four *KRAS* mutant alleles including G12S (sgG12S),  
239 G12V (sgG12V), G12C (sgG12C) and G12D (sgG12D).

240 We first examined the activity of these five sgRNAs in 293T cells (Figure 1B), which harboring  
241 the wild-type *KRAS* gene. To confirm the editing efficiency of sgG12-WT, and the specificity of

242 sgG12-Mu (mutant), we transfected plasmids encoding spCas9 and different sgRNAs (Additional  
243 file 1: Figure S.1A) into 293T cells separately. We found that sgG12-WT disrupted KRAS-WT  
244 efficiently with an efficiency of 66% by T7E1 assay, while the editing efficiency of sgG12S, sgG12V,  
245 sgG12C and sgG12D in *KRAS*-WT were 3%, 12%, 2% and 15%, respectively (Figure 1B). Thus,  
246 sgG12S and sgG12C were more specific with much lower off-target effects on wildtype KRAS.  
247 Next, we confirmed the editing efficiency of sgG12S in A549 lung adenocarcinoma cells harboring  
248 *KRAS* G12S mutant allele. H2228, another lung adenocarcinoma cell line, carrying no G12S mutant  
249 allele, was utilized as a negative control. Lentivirus containing spCas9-sgG12S or spCas9-sgG12-  
250 WT, and non-targeting control virus (Figure 1C) were respectively infected into A549 and H2228  
251 cells. We found that spCas9-sgG12S edited *KRAS* G12S mutant allele in A549 cells with a high  
252 efficiency of 89%, while the editing efficiency was only 1% in wild-type *KRAS* allele in H2228 cells.  
253 Even the 1% was maybe the experimental background (Figure 1D). On the other hand, sgG12-WT  
254 edited *KRAS* in A549 and H2228 cells with editing efficiency of 38% and 82%, respectively,  
255 indicating that sgG12-WT non-specifically bound to *KRAS* G12S sites with a high mismatch  
256 tolerance. To further confirm that sgG12S specifically edited *KRAS* G12S mutant allele, but not the  
257 wild-type allele, *KRAS* gene in puromycin selected A549 and H2228 cells 2-3 days post infection  
258 was sequenced (Figure 1E). *KRAS* in A549 was destroyed around PAM (TGG) sequence, while  
259 H2228 was not affected, further confirming the success of our spCas9- sgG12S system in efficient  
260 and specific targeting *KRAS* G12S allele (Figure 1F).

## 261 **Genome editing of *KRAS* G12S mutant allele inhibits the** 262 **proliferation and cell cycle of tumor cells *in vitro***

263 To investigate whether targeting and disruption of the *KRAS* mutant allele by sgG12S could inhibit  
264 the proliferation of tumor cells, the cell numbers of A549 and H2228 cells were examined after gene  
265 editing (Figure 2A). The proliferation of sgG12S-targeted A549 cells was dramatically inhibited and  
266 almost retarded compared to non-targeting control and untreated groups. While the targeting of  
267 sgG12S had no effect on the proliferation of H2228 cells. Besides, a cell colony formation assay  
268 (CFA) (Figure 2B) and CCK-8 cell proliferation assay (Figure 2C) also confirmed the growth  
269 inhibition by Cas9- sgG12S targeting. As demonstrated in cell counting (Figure 2A), the  
270 proliferation of A549 cells was significantly suppressed shown in the CFA and CCK-8 assays. In  
271 contrast, the targeting of sgG12S had a less effect on the proliferation of H2228 cells carrying the  
272 wild-type *KRAS* allele.

273 We further assessed the cell cycle of sgG12S-targeted A549 and H2228 cells (Figure 2D). The  
274 Cas9-sgG12S treated A549 cells was mostly arrested at S phase, and the ratio of cell population at  
275 G2/M phase was downregulated correspondingly, while there was no effect on the cell cycle of  
276 sgG12S treated H2228 cells. Next, we examined the activities of KRAS downstream signaling  
277 pathways including the expression and activation of AKT and ERK (Figure 2E). The treatment of  
278 Cas9-sgG12S in A549 tumor cells dramatically suppressed the expression of KRAS (G12S) protein.  
279 While the expression of wild-type KRAS protein were not affected in H2228 cells. Besides, the  
280 levels of phosphorylated-AKT (S473) and phosphorylated-ERK (T202/Y204) proteins were  
281 significantly downregulated in A549 cells edited with SpCas9-sgG12S, while another type of  
282 phosphorylated-ERK (T183/Y185) protein was not affected. As expected, AKT and ERK signaling

283 pathways in H2228 cells were not affected by SpCas9-sgG12S. Collectively, our results suggested  
284 that the mutant allele-specific targeting by sgG12S can efficiently inhibit tumor cell proliferation  
285 and arrest the cycle of tumor cells at S phase, probably through downregulating AKT and ERK  
286 signaling pathways.

## 287 **Transcription-repressing system dCas9-KRAB inhibited** 288 **proliferation of tumor cells *in vitro***

289 We next explored whether there were off-target effects of the mutant allele-specific nuclease besides  
290 *KRAS* gene region by targeted deep sequencing at 14 potential off-target sites amplified by PCR  
291 primers (Additional file 1: Supplemental Table 1). The potential off-target sites which were different  
292 from the on-target site by up to 4 nt mismatch in the human genome were identified by Feng Zhang  
293 lab's CAS-OFFinder algorithm (<http://www.rgenome.net/cas-offinder/>). No indel was detected at  
294 these sites in Cas9-sgG12S treated A549 and H2228 tumor cells (Figure 3A, 3B).

295 Genome-editing system has the likelihood to cause undesired double stand break (DSB) in the  
296 genome (Figure 1B, 1D). In order to avoid the undesired disruption of genome, we constructed a  
297 non-cutting transcription-regulating system, dCas9-KRAB system (Figure 3C), where KRAB is a  
298 transcriptional repressor to downregulate mRNA expression when binding to the regulatory  
299 elements of certain genes<sup>30,31</sup>. To test whether sgG12S linked to dCas9-KRAB may repress *KRAS*  
300 expression specifically in G12S mutant allele, A549 and H2228 cells were infected by dCas9-  
301 KRAB-sgG12S and non-targeting control lentivirus. As expected, the transcription of *KRAS* G12S  
302 mutant allele in dCas9-KRAB-sgG12S treated A549 cells was dramatically downregulated  
303 compared to non-targeting control or untreated cells (Figure 3D). While in H2228 cells, the

304 transcription of wild-type *KRAS* was not affected in all three groups. In addition, the effect on tumor  
305 cell growth was also investigated by CCK-8 assay (Figure 3E). Consistently, the proliferation of  
306 dCas9-KRAB-sgG12S treated A549 cells was inhibited significantly compared to the controls,  
307 while no significant effect on H2228 tumor cell growth was observed. These results confirmed the  
308 specificity of the dCas9-KRAB system *in vitro*.

## 309 **Targeting KRAS-G12S mutant blocks tumor growth in** 310 **tumor-bearing mice**

311 To further explore the effects of sgG12S targeting *in vivo*, AdV-Cas9-sgG12S and non-targeting  
312 control adenovirus were constructed and packaged (Additional file 1: Figure S2A). Since lentivirus  
313 is limited to *in vitro* or *ex vivo* gene delivery due to their restricted insertional capacities and  
314 relatively low titers<sup>32</sup>, the *in vivo* experiments were conducted by adenoviral infection. The editing  
315 efficiency of AdVs was firstly confirmed in A549 and H2228 cells by T7E1 assay (Additional file  
316 1: Figure S2B) and sanger sequencing (Additional file 1: Figure S2C). As expected, AdV-Cas9-  
317 sgG12S specifically edited *KRAS* G12S mutant allele in A549 cells, but not in H2228 cells harboring  
318 wild-type *KRAS* gene. In addition, AdV-Cas9-sgG12S inhibited the proliferation of A549, but not  
319 H2228 tumor cells *in vitro* (Additional file 1: Figure S2D).

320 Next, we examined the effect of sgG12S editing in cell-derived xenograft models of A549 and  
321 H2228 cells, respectively (Figure 4A-D). Local injection of AdV-Cas9-sgG12S significantly  
322 inhibited tumor growth, resulting in a 46% reduction in tumor volume ( $P < 0.01$ ) in A549-bearing  
323 mice (Figure 4A). In contrast, tumor volumes of control groups treated with either PBS or AdV-  
324 Cas9 vector grew over time, reaching an average size of more than 2000 mm<sup>3</sup> 28 days after treatment



325 (Figure 4A). As expected, no significant difference in tumor volume showed between AdV-Cas9-  
326 sgG12S, AdV-Cas9 vector and PBS-treated mice implanted with H2228 cells containing the wild-  
327 type KRAS allele (Figure 4B), confirming the high specificity of *KRAS* targeting *in vivo*. The tumor  
328 weight was also significantly decreased by 30% in animals treated with AdV-Cas9-sgG12S,  
329 compared to control groups treated with either AdV-Cas9 vector or PBS ( $P<0.05$ ) in A549 bearing  
330 mice (Figure 4C). Consistent with tumor volume, there was no difference in tumor weight of H2228  
331 implanted groups (Figure 4D).

332 To examine the efficacy of repressing G12S transcription by dCas9-KRAB system *in vivo*, NSG  
333 mice were xenografted with A549 and H2228 cells, and treated with dCas9-KRAB-sgG12S, non-  
334 targeting virus, or PBS when subcutaneously implanted tumors reached a volume of 100-200 mm<sup>3</sup>  
335 (Figure 4E-H). The mice xenografted with A549 cells and treated with dCas9-KRAB-sgG12S  
336 showed 15.6% ( $P<0.05$ ) decrease in tumor volume compared to control (Figure 4E) and exhibited  
337 no notable metastasis or mortality during the observation period of 28 days. In contrast, the mice  
338 xenografted with H2228 cells treated with dCas9-KRAB-sgG12S did not show any inhibition of  
339 tumor growth but instead experienced a quick increase in tumor volume (Figure 4F). Similar rate of  
340 increase in tumor volume also observed in mice treated with non-targeting vector or PBS. Tumor  
341 weights were also measured in mice treated with different viruses (Figure 4G, 4H). A significant  
342 decrease of tumor weight (28.2%,  $P<0.05$ ) was observed in dCas9-KRAB-sgG12S treated mice  
343 xenografted with A549 cells (Figure 4G), but not in mice xenografted with H2228 cells with either  
344 dCas9-KRAB-sgG12S, non-targeting vector or PBS treatment (Figure 4H).

345 Throughout the mice study of gene-editing and transcription-repressing systems, no sign of  
346 weight loss (Additional file 1: Figure S3A-S3D) was observed. Taken together, these *in vivo* data

347 suggest that gene targeting of mutant *KRAS* by SpCas9-sgG12S and dCas9-KRAB-sgG12S is  
348 effective and only restricted to tumors with the targeted *KRAS* mutations, with no obvious effects  
349 on other cell types. Besides, CRISPR/Cas9 genome-editing system targeting mutant *KRAS* is more  
350 effective compared with the dCas9-KRAB mRNA-regulating system.

## 351 **Disruption of KRAS-G12S mutant allele significantly** 352 **inhibited the expression of mutant KRAS *in vivo***

353 The antitumor efficacy of oncogenic mutant-specific gene-editing and mRNA-regulating systems  
354 were further investigated by western blot and immunohistochemical (IHC) staining in the xenograft  
355 tumor tissues disrupting KRAS-G12S mutant alleles (Figure 5). Western blot (WB) assay revealed  
356 a markedly reduced expression level of KRAS and KRAS G12S mutant proteins in the tumor tissues  
357 of A549 cells-engrafted mice edited by AdV-Cas9-sgG12S, but not in AdV-Cas9 treated control  
358 group. While in the tumor tissues of H2228 cells-engrafted mice, the expression level of wild-type  
359 KRAS protein was not dramatically changed in AdV-Cas9 or AdV-Cas9-sgG12S treated groups  
360 (Figure 5A). Consistently, dCas9-KRAB-sgG12S but not V2 treated tumor tissues exhibited  
361 markedly lower levels of both total and mutant KRAS proteins in A549-engrafted mice, but not in  
362 H2228-engrafted mice (Figure 5B). Importantly, tumor tissues from A549-engrafted mice treated  
363 with AdV-Cas9-sgG12S and dCas9-KRAB-sgG12S both showed significant reduction of KRAS  
364 G12S protein through in situ IHC staining, but such decrease was not observed in the control  
365 groups(Figure 5C, 5D), implying that CRISPR/Cas9 system can efficiently target and reduce KRAS  
366 mutant protein expression. Taken together, these data indicate that both the gene-cutting CRISPR-  
367 Cas9 and mRNA-regulating dCas9-KRAB systems provide strong inhibitory effects on expression

368 of oncogenic proteins, resulting in marked anti-tumor efficacy.

## 369 **Extending the strategy of targeting tumor-specific mutant** 370 **locus by gene editing system**

371 Cas9-sgG12S editing system is a highly specific strategy to target cancer driver gene mutation  
372 with almost no difference in off-target effects between sgG12S and control groups in all cell lines  
373 we treated (Figure 3A, 3B). Moreover, Cas9-sgG12S targeting specifically and efficiently inhibits  
374 tumor growth, both in vitro and in vivo. Thus, this approach holds great potential to treat *KRAS*  
375 G12S mutation-driven cancers. In order to extend this strategy to different DNA nucleases to target  
376 other oncogenic mutations, driver gene mutations were collected from Cosmic database and the top  
377 20 driver genes were selected to continue our proof-of-concept study (Figure 6A). These high-  
378 frequency driver gene mutations, including *JAK2*, *TP53*, *KRAS*, *EGFR*, etc., are widely spread in  
379 human malignancies (Figure 6B). Among these mutations, most of them are missense mutations,  
380 leading to single nucleotide variation (SNV) (Figure 6C). SNV occupies 74% of the whole mutations,  
381 while the percentage of deletion, insert and indel (insert and deletion) mutations is 16%, 7% and  
382 3%, respectively.

383 There are large amounts of mutations of each cancer driver gene, and it is important to discover  
384 whether these oncogenic mutations can be edited or not and which DNA nucleases can be applied  
385 to edit them. To identify the mutations that could be specifically targeted by editing nucleases  
386 including SpCas9, SaCas9 and LbCpf1, we analyzed the SNV mutations to examine whether their  
387 flanking sequences fit the PAM or seed sequence requirements (Additional file 1: Figure S4). There  
388 is a length limitation of the seed sequence, and the seed sequence length of different nucleases is

389 different (Figure 6D). In order to guarantee the targeting specificity, the lower limitation of the seed  
390 sequence length was used as threshold in our analysis (Additional file 1: Figure S4). Among the  
391 31555 SNV mutations of the 20 genes, about half of them can be edited by these three CRISPR  
392 nucleases (Figure 6E). PAM sequence lying in the sense (S) or the anti-sense (AS), or both sense  
393 and anti-sense (S+AS) sequences were counted respectively. The genes carrying over 50%  
394 mutations editable by either of the three CRISPR nucleases occupy half of the 20 genes, including  
395 *JAK2*, *EGFR*, *BRAF*, *IDH1*, *TERT*, *PIK3CA*, *CTNNB1*, *MUC16*, *LRP1B*, and *DNMT3A* (Figure 6F).  
396 The range of the SNV mutations that can be edited of each gene varies between 20.7% to 70.7%,  
397 and the highest predicted editing frequency is in *TERT* gene by SpCas9. What obvious is that the  
398 distribution of LbCpf1 PAM sequence is less frequent than that of SpCas9 and SaCas9. Altogether,  
399 specific targeting of cancer driver mutations by CRISPR nucleases has giant potential in treating  
400 oncogenic mutation-driven cancers, especially in the types of cancers that don't have effective  
401 therapies. On the other hand, through bioinformatic analysis of 31555 SNV mutations, references  
402 were given to target these oncogenic mutations. At the same time, a bioinformatic pipeline was  
403 provided to analyze the distribution of PAM sequences and to estimate the target potential of other  
404 candidate genes by this high-throughput method.

## 405 Discussion

406 CRISPR/Cas9 genome-editing system is a powerful technique which can target genomes or their  
407 mutated sequences specifically. In our study, CRISPR/Cas9 was used to specifically target *KRAS*  
408 mutant allele but not the wild-type allele. In addition to *KRAS* mutant alleles, other cancer-driven  
409 mutations including *EGFR* mutation (L858R), genomic rearrangements (TMEM135–CCDC67 and

410 MAN2A1–FER fusions) and *BRAF* (V600E) driver mutation were disrupted by CRISPR systems  
411 to control tumor growth<sup>18,19,33</sup>. Compared with *KRAS* mutations-driven cancers, which still don't  
412 have clinically available inhibitors, there are already some clinical EGFR inhibitors used in lung  
413 cancers with *EGFR* gene mutations, including Erlotinib (Tarceva), Afatinib (Gilotrif), Gefitinib  
414 (Iressa), Osimertinib (Tagrisso), Dacomitinib (Vizimpro) and Necitumumab (Portrazza). And  
415 clinical drugs that target cells with BRAF gene changes include Dabrafenib (Tafinlar) and  
416 Trametinib (Mekinist). While TMEM135–CCDC67 and MAN2A1–FER fusions occur less than  
417 *KRAS* mutations in human cancers. Therefore, there is much significance in targeting *KRAS* mutant  
418 alleles, which may hold great hopes for future cancer treatment.

419 Compared to the traditional treatments using inhibitors of KRAS pathway, CRISPR-Cas system  
420 has extended the precious targeting from protein level to the genomic DNA level, and this strategy  
421 can be wildly and easily spread to other oncogenic mutations. The development of traditional  
422 inhibitors, including antibodies and small molecules, is complicated and the whole process can not  
423 be universally applied for individual targets. For example, though KRAS G12C inhibitor released  
424 by Amgen gave promising clinical outcome on its specific targets (NCT03600883), it did not show  
425 any effect on other KRAS mutant alleles, and retargeting of different KRAS mutation required new  
426 designment which is time and money consuming. However, CRISPR system is capable to target  
427 different mutant alleles specifically and precisely, and can be easily transferred to other oncogenic  
428 mutations by only changing the sgRNA sequences. On another aspect, traditional therapy will cause  
429 tumor resistance and secondary mutations. While genome-editing targets mutations at the DNA level  
430 and deplete mutations completely. Lastly, combined with NGS, individual patients can be precisely  
431 treated by CRISPR/SpCas9 targeting on their unique mutations. And editing of oncogenic mutations

432 could also be combined with inhibitors of KRAS or other oncogenic mutations, or immunotherapy  
433 to further improve the anti-tumor efficacy.

434 In previous studies, CRISPR-Cas9 system was harnessed to rectify disease-associated genetic  
435 defects<sup>34-36</sup> and deactivate disease-causing wild-type genes<sup>37-39</sup>. However, these targeting still has  
436 limited specificity without discriminating perturbation of both the wild type oncogene and mutant  
437 alleles. Our study showed that single-nucleotide mutation of a cancer driver gene in tumor cells can  
438 be selectively disrupted both *in vitro* and *in vivo* by using sgRNAs which distinguish the mutant  
439 allele from the WT one. Among the four sgRNAs targeting mutations at G12 locus, sgG12S shows  
440 the highest specificity and can discriminate a single-nucleotide polymorphism (SNP) difference in  
441 tumor cells (Figure 1B, D, E). To our knowledge, this is the first report to demonstrate that the *KRAS*  
442 G12S mutant allele could be targeted specifically, thereby inhibiting tumor growth *in vivo*. Though  
443 Kim W. *et al.*<sup>20</sup> has targeted G12V, G12D and G13D mutant alleles with lentiviral and adeno-  
444 associated viral (AAV) vectors, respectively, the mechanisms related to the tumor inhibition by  
445 targeting *KRAS* mutant alleles was not illustrated in this study. Zhao X. *et al.*<sup>22</sup> has used CRISPR-  
446 Cas13a system to knockdown *KRAS* G12D allele at the transcriptional level. CRISPR-Cas13a  
447 system was reported to be tolerant to one mismatch and sensitive to two mismatches in the crRNA-  
448 target duplex, thus a second mismatch to the crRNA had to be introduced in their study, which is  
449 not so feasible to use since such a proper mutation needs to be selected out before targeting *KRAS*  
450 mutant alleles specifically. In addition, the off-target effects were not assessed.

451 In our study, we showed mutant allele-specific gene elimination in A549 tumors *in vivo*. Damage  
452 of the driver gene mutation *KRAS* G12S allele in A549 tumors resulted in block of cancer cell growth.  
453 Besides, on- and off-target indels as well as cell cytotoxicity associated with CRISPR/Cas9 editing

454 were not detectably in H2228 cells which harbor wild-type *KRAS* alleles. These results are consistent  
455 with *in vivo* data that tumor growth inhibition was not observed in AdV-Cas9-sgG12S treated H2228  
456 tumors, demonstrating the specificity of CRISPR/Cas9 for targeting a mutant allele that is in the  
457 seed sequence, which is in line with the previous report by Cong *et al.*<sup>16</sup>. In another study,  
458 CRISPR/Cas9 was used to target a mutant allele where the single nucleotide mutation generates a  
459 5'-NGG-3' PAM sequence that WT allele did not have, thus enabling specific targeting of mutant  
460 allele by Cas9 nuclease<sup>18</sup>. To extend this strategy to other cancer-driven mutations, which either  
461 locate in seed sequence or generate PAM sequences recognized by SpCas9 or other Cas9 variants,  
462 we chose top 20 mutated genes in human cancers and analyzed whether their mutations could be  
463 targeted by SpCas9, SaCas9 and LbCpf1, by analyzing the seed region and PAM sequence (Figure  
464 6E, 6F, Additional file 1: S4). We found that PAM sequence of CRISPR nucleases, especially for  
465 SpCas9 and SaCas9, are widely distributed around the mutated sites. The results indicate that this  
466 approach could be widely used to target other oncogenic mutations, and could also be extended to  
467 other Cas9 families or variants. What's more, this approach could be utilized for multiple gene  
468 editing in cancers which are frequently characterized by mutation heterogeneity, and to test  
469 functional relevance of tumor mutations employing CRISPR/Cas9<sup>40,41</sup>.

470 Compared to the two previous studies<sup>20,22</sup>, we assessed the off-target effects *in vitro* (Figure 3A,  
471 3B) and found there were low off-target effects during our targeting. Besides, we found the related  
472 mechanisms that disruption of *KRAS* G12S allele leads to blockade of AKT and ERK signaling  
473 pathways, thus inhibiting tumor growth, which was confirmed by WB results. Furthermore, we  
474 assessed the non-cutting system dCas9-KRAB in addition to Cas9-sgG12S cleaving system, and  
475 found the transcription repression system is also capable to inhibit tumor growth both *in vitro* and

476 *in vivo*, though at a lower efficiency compared to direct cutting at mutant allele. Given that dCas9-  
477 KRAB-sgG12S treatment only lead to transient transcription repression when binding rather than  
478 change the genome sequence of the mutant gene, the continuous growth inhibition of proliferating  
479 tumor cells may not be achieved completely using dCas9-KRAB-sgG12S. From this angle, the  
480 genome-editing CRISPR/Cas9 system is more practical to eliminate KRAS activation persistently.  
481 Based on our data, this mutation-sgRNA designing strategy is capable to distinguish the mutant  
482 allele from WT one at the resolution of single nucleotide differences, thus enables KRAS mutation-  
483 targeting at a high specificity, which is also beneficial to treat a broad spectrum of oncogenic  
484 mutations. Among thousands of mutations of the top 20 cancer driver genes we surveyed, above 50%  
485 mutations of ten genes have potential to be targeted by CRISPR system through our bioinformatic  
486 analysis. Not every oncogenic mutation can be specifically targeted due to the lack of PAM sequence,  
487 and our bioinformatic pipeline provides an easy, efficient, and high-throughput way to predict the  
488 sites which is editable.

## 489 **Conclusions**

490 In conclusion, we systematically demonstrated gene-editing and mRNA-regulating systems targeted  
491 *KRAS* G12S mutant allele specifically and both *in vitro* tumor cell proliferation and *in vivo* tumor  
492 growth were inhibited. In addition, bioinformatic analysis of 31555 SNP oncogenic mutations  
493 provided a pipeline to analyze the distribution of PAM sequence for editing targets screening.

## 494 **List of abbreviations**

---

Abbreviations

---



|        |                                                           |
|--------|-----------------------------------------------------------|
| PDACs  | pancreatic ductal adenocarcinomas                         |
| CRCs   | colorectal adenocarcinomas                                |
| LACs   | lung adenocarcinomas                                      |
| CRISPR | Clustered regularly interspaced short palindromic repeats |
| SpCas9 | S.pyogenes CRISPR associated protein 9                    |
| EGFR   | epidermal growth factor receptor                          |
| dCas9  | dead Cas9                                                 |
| KRAB   | Krüppel associated box                                    |
| PAM    | protospacer adjacent motif                                |
| NGS    | next generation sequencing                                |
| CFA    | colony formation assay                                    |
| DSB    | double stand break                                        |
| IHC    | immunohistochemical                                       |
| WB     | western blot                                              |
| SNV    | single nucleotide variation                               |
| S      | sense                                                     |
| AS     | anti-sense                                                |
| SNP    | single-nucleotide polymorphism                            |
| AAV    | adeno-associated viral                                    |
| ATCC   | American Type Culture Collection                          |
| DMEM   | Dulbecco's modified Eagle's medium                        |
| GAPDH  | glyceraldehyde 3-phosphate dehydrogenase                  |

H&E      hematoxylin and eosin

---

## 495 **Declarations**

### 496 **Ethics approval and consent to participate**

497 The mouse model studies were performed according to the guidelines provided by the Chinese  
498 Animal Welfare Act and approved by the Institutional Review Board on Bioethics and Biosafety of  
499 BGI.

### 500 **Consent for publication**

501 Not applicable.

### 502 **Availability of data and materials**

503 Data supporting this study have been deposited in the CNSA ( <https://db.cngb.org/cnsa/>) of  
504 CNGBdb with accession code CNP0000672.

### 505 **Competing interests**

506 The authors declare that they have no competing interests.

### 507 **Funding**

508 This work was supported by National Natural Science Foundation of China (No.81903159 and  
509 No.81502578), Science, Technology and Innovation Commission of Shenzhen Municipality (No.  
510 JCYJ20170817145218948 and JCYJ20170817150015170).

## 511 **Authors' contributions**

512 C-CC, YG and YM supervised the project and revised the manuscript. QG and XH designed and  
513 performed the research, and QG wrote the manuscript. WO and BK performed the research and  
514 revised the manuscript. YX designed and performed the mouse experiments. RD, YL, EW, LC, XD,  
515 YL and BZ performed the experiments. LH, DW and ZZ performed the data analyses. YH and HY  
516 reviewed the manuscript.

## 517 **Acknowledgements**

518 We thank Yuping Ge for her support in the mouse experiments. Thank Lu Lin and Xiaoyu Wei for  
519 their support in data analysis. Thank Huanyi Chen for her help in some experiments. Thank the  
520 support of Guangdong Provincial Key Laboratory of Genome Read and Write, and Guangdong  
521 Provincial Academician Workstation of BGI Synthetic Genomics.

## 522 **Authors' information**

523 [gaoqianqian@genomics.cn](mailto:gaoqianqian@genomics.cn); [ouyangwenjie@cngb.org](mailto:ouyangwenjie@cngb.org); [kangbin@cngb.org](mailto:kangbin@cngb.org); [hanxu@matridx.com](mailto:hanxu@matridx.com);  
524 [xiongying840501@163.com](mailto:xiongying840501@163.com); [dingrenpeng@genomics.cn](mailto:dingrenpeng@genomics.cn); [liyijian@genomics.cn](mailto:liyijian@genomics.cn); [wangfei2@genomics.cn](mailto:wangfei2@genomics.cn);  
525 [huanglei@genomics.cn](mailto:huanglei@genomics.cn); [chenlei4@cngb.org](mailto:chenlei4@cngb.org); [wangdan6@genomics.cn](mailto:wangdan6@genomics.cn); [dongxuan@cngb.org](mailto:dongxuan@cngb.org);  
526 [zhangzhao1@genomics.cn](mailto:zhangzhao1@genomics.cn); [1361020683@qq.com](mailto:1361020683@qq.com); [zebaichen@foxmail.com](mailto:zebaichen@foxmail.com); [huyong@genomics.cn](mailto:huyong@genomics.cn);

## 527 **References**

- 528 1. JL B, ER F, SR H, et al. Prevalence of ras gene mutations in human colorectal cancers. *Nature*.  
529 1987;327(6120):293-297.
- 530 2. K F, C A, K H, WE G, M P. Detection of high incidence of K-ras oncogenes during human colon

- 531 tumorigenesis. *Nature*. 1987;327(6120):298-303.
- 532 3. S R, ML vdW, WJ M, SG E, N vZ, JL B. Mutational activation of the K-ras oncogene. A possible  
533 pathogenetic factor in adenocarcinoma of the lung. *The New England journal of medicine*.  
534 1987;317(15):929-935.
- 535 4. C A, D S, K F, J M, N A, M P. Most human carcinomas of the exocrine pancreas contain mutant  
536 c-K-ras genes. *Cell*. 1988;53(4):549-554.
- 537 5. Siegel RL, Miller KD, Jemal A. Cancer statistics, 2018. *CA: a cancer journal for clinicians*.  
538 2018;68(1):7-30.
- 539 6. Cox AD, Der CJ. Ras history: The saga continues. *Small GTPases*. 2010;1(1):2-27.
- 540 7. B. P, Der CJ. Drugging RAS: Know the enemy. *Science*. 2017;355:1158-1163.
- 541 8. Consortium APG. AACR Project GENIE: Powering Precision Medicine through an  
542 International Consortium. *Cancer discovery*. 2017;7(8):818-831.
- 543 9. Zeitouni D, Pylayeva-Gupta Y, Der CJ, Bryant KL. KRAS Mutant Pancreatic Cancer: No Lone  
544 Path to an Effective Treatment. *Cancers (Basel)*. 2016;8(4).
- 545 10. McCormick F. KRAS as a Therapeutic Target. *Clinical Cancer Research*. 2015;21(8):1797-  
546 1801.
- 547 11. Ostrem JM, Peters U, Sos ML, Wells JA, Shokat KM. K-Ras(G12C) inhibitors allosterically  
548 control GTP affinity and effector interactions. *Nature*. 2013;503(7477):548-551.
- 549 12. Lim SM, Westover KD, Ficarro SB, et al. Therapeutic targeting of oncogenic K-Ras by a  
550 covalent catalytic site inhibitor. *Angew Chem Int Ed Engl*. 2014;53(1):199-204.
- 551 13. Sarthy AV, Morgan-Lappe SE, Zakula D, et al. Survivin depletion preferentially reduces the  
552 survival of activated K-Ras-transformed cells. *Molecular Cancer Therapeutics*. 2007;6(1):269-

- 553 276.
- 554 14. Kumar MS, Hancock DC, Molina-Arcas M, et al. The GATA2 transcriptional network is  
555 requisite for RAS oncogene-driven non-small cell lung cancer. *Cell*. 2012;149(3):642-655.
- 556 15. Morgan-Lappe SE, Tucker LA, Huang X, et al. Identification of Ras-related nuclear protein,  
557 targeting protein for xenopus kinesin-like protein 2, and stearyl-CoA desaturase 1 as promising  
558 cancer targets from an RNAi-based screen. *Cancer research*. 2007;67(9):4390-4398.
- 559 16. Cong L, Ran FA, Cox D, et al. Multiplex genome engineering using CRISPR/Cas systems.  
560 *Science*. 2013;339(6121):819-823.
- 561 17. Hsu PD, Lander ES, Zhang F. Development and Applications of CRISPR-Cas9 for Genome  
562 Engineering. *Cell*. 2014;157(6):1262-1278.
- 563 18. Koo T, Yoon AR, Cho HY, Bae S, Yun CO, Kim JS. Selective disruption of an oncogenic mutant  
564 allele by CRISPR/Cas9 induces efficient tumor regression. *Nucleic acids research*. 2017.
- 565 19. Chen ZH, Yu YP, Zuo ZH, et al. Targeting genomic rearrangements in tumor cells through Cas9-  
566 mediated insertion of a suicide gene. *Nature biotechnology*. 2017;35(6):543-550.
- 567 20. Kim W, Lee S, Kim HS, et al. Targeting mutant KRAS with CRISPR-Cas9 controls tumor  
568 growth. *Genome Res*. 2018.
- 569 21. Lee W, Lee JH, Jun S, Lee JH, Bang D. Selective targeting of KRAS oncogenic alleles by  
570 CRISPR/Cas9 inhibits proliferation of cancer cells. *Scientific reports*. 2018;8(1):11879.
- 571 22. Zhao X, Liu L, Lang J, et al. A CRISPR-Cas13a system for efficient and specific therapeutic  
572 targeting of mutant KRAS for pancreatic cancer treatment. *Cancer letters*. 2018;431:171-181.
- 573 23. Li H, Durbin R. Fast and accurate short read alignment with Burrows-Wheeler transform.  
574 *Bioinformatics*. 2009;25(14):1754-1760.

- 575 24. Li H, Handsaker B, Wysoker A, et al. The Sequence Alignment/Map format and SAMtools.  
576 *Bioinformatics*. 2009;25(16):2078-2079.
- 577 25. Li H. A statistical framework for SNP calling, mutation discovery, association mapping and  
578 population genetical parameter estimation from sequencing data. *Bioinformatics*.  
579 2011;27(21):2987-2993.
- 580 26. Magoc T, Salzberg SL. FLASH: fast length adjustment of short reads to improve genome  
581 assemblies. *Bioinformatics*. 2011;27(21):2957-2963.
- 582 27. Yang H, Wang K. Genomic variant annotation and prioritization with ANNOVAR and  
583 wANNOVAR. *Nature protocols*. 2015;10(10):1556-1566.
- 584 28. Wang K, Li M, Hakonarson H. ANNOVAR: functional annotation of genetic variants from high-  
585 throughput sequencing data. *Nucleic acids research*. 2010;38(16):e164.
- 586 29. Shirley MD, Ma Z, Pedersen BS, Wheelan SJ. Efficient "pythonic" access to FASTA files using  
587 pyfaidx. *PeerJ Preprints*.
- 588 30. Gilbert LA, Larson MH, Morsut L, et al. CRISPR-mediated modular RNA-guided regulation of  
589 transcription in eukaryotes. *Cell*. 2013;154(2):442-451.
- 590 31. Yeo NC, Chavez A, Lance-Byrne A, et al. An enhanced CRISPR repressor for targeted  
591 mammalian gene regulation. *Nature methods*. 2018;15(8):611-616.
- 592 32. Kubo S, Mitani K. A new hybrid system capable of efficient lentiviral vector production and  
593 stable gene transfer mediated by a single helper-dependent adenoviral vector. *Journal of*  
594 *virology*. 2003;77(5):2964-2971.
- 595 33. Yang M, Wei H, Wang Y, et al. Targeted Disruption of V600E-Mutant BRAF Gene by CRISPR-  
596 Cpf1. *Molecular therapy Nucleic acids*. 2017;8:450-458.

- 597 34. Yoshimi K, Kaneko T, Voigt B, Mashimo T. Allele-specific genome editing and correction of  
598 disease-associated phenotypes in rats using the CRISPR-Cas platform. *Nature communications*.  
599 2014;5:4240.
- 600 35. Wu Y, Liang D, Wang Y, et al. Correction of a genetic disease in mouse via use of CRISPR-  
601 Cas9. *Cell stem cell*. 2013;13(6):659-662.
- 602 36. Porter DL, Levine BL, Kalos M, Bagg A, June CH. Chimeric antigen receptor-modified T cells  
603 in chronic lymphoid leukemia. *The New England journal of medicine*. 2011;365(8):725-733.
- 604 37. Li W, Cho MY, Lee S, Jang M, Park J, Park R. CRISPR-Cas9 mediated CD133 knockout inhibits  
605 colon cancer invasion through reduced epithelial-mesenchymal transition. *PloS one*.  
606 2019;14(8):e0220860.
- 607 38. Li A, Yao L, Fang Y, et al. Specifically blocking the fatty acid synthesis to inhibit the malignant  
608 phenotype of bladder cancer. *Int J Biol Sci*. 2019;15(8):1610-1617.
- 609 39. Huang K, Yang C, Wang QX, et al. The CRISPR/Cas9 system targeting EGFR exon 17  
610 abrogates NF-kappaB activation via epigenetic modulation of UBXN1 in EGFRwt/vIII glioma  
611 cells. *Cancer letters*. 2017;388:269-280.
- 612 40. Gebler C, Lohoff T, Paszkowski-Rogacz M, et al. Inactivation of Cancer Mutations Utilizing  
613 CRISPR/Cas9. *J Natl Cancer Inst*. 2017;109(1).
- 614 41. Takeda H, Kataoka S, Nakayama M, et al. CRISPR-Cas9-mediated gene knockout in intestinal  
615 tumor organoids provides functional validation for colorectal cancer driver genes. *Proceedings*  
616 *of the National Academy of Sciences of the United States of America*. 2019;116(31):15635-  
617 15644.

## 618 **Figure legend**

619 **Figure 1. KRAS G12S oncogenic mutant-specific Cas9.** **a** Mutations (red) at KRAS G12 site  
620 locate in the seed sequence of a PAM (blue). The human KRAS gene is located on chromosome 12.  
621 Oncogenic KRAS single-nucleotide substitutions within exon-1 of KRAS (c. 34G>A, c.35 G > T,  
622 c.34 G>T and c.35 G > A) result in G12S, G12V, G12C and G12D mutations. Design of their  
623 corresponding gRNAs was listed with a bottom line. **b** Editing efficiency of different gRNAs in  
624 293T cells. Effective editing of genes is presenting by the appearance of cleaved band. And the gene  
625 editing efficiency is listed in lanes correspondingly. **c** Maps of lentiviral vectors, including  
626 LentiCRISPR V2 blank vector, sgG12S and WT guide RNA expressing vectors. **d** Efficiency and  
627 specificity of sgG12S and sgG12-WT in A549 and H2228 tumor cells infected with sgG12S or  
628 sgG12-WT lentiviruses 48 h post-infection. Effective editing of genes is presenting by the  
629 appearance of leaved band. And the gene editing efficiency is listed in lanes correspondingly. **e** Gene  
630 editing event was confirmed by sanger sequencing in A549 and H2228 cells. PAM sequence is  
631 marked in red box. **f** Diagram of the genome therapy strategy to target KRAS G12S mutant allele  
632 specifically.  
633 Blue strands: spacer; green strands: PAM sequence; red strands and star: single-nucleotide missense  
634 mutations.

635 **Figure 2. The anti-tumor effects of targeting KRAS G12S mutant allele *in vitro*.** A549 and  
636 H2228 cells were subjected to cell proliferation (A), colony forming (B), CCK-8 (C), cell cycle (D)  
637 and WB (E) assays after treatment with lentiviral Cas9 and sgRNAs targeting KRAS G12S mutant  
638 allele. Error bars represent S.E.M. (\*) 0.01<P < 0.05, (\*\*) 0.001<P < 0.01, (\*\*\*) P < 0.001. **a** Cell  
639 growth curves determined by counting cell number with various treatments at different timepoints.



640 **b** Colony formation assay in A549 and H2228 cells. Representative images of wells after 0.5%  
641 crystal violet staining are shown at left and colony number was determined 2 weeks after cell plating  
642 and treated with Cas9-sgG12S and sgG12-WT. **c** CCK-8 assay in A549 and H2228 cells. Cell  
643 proliferation was determined by use of CCK-8 reagents at different timepoints after plating. The  
644 number of cells in cultures with different treatments was accessed by the optical density at 490 nm  
645 of each CCK-8 reaction. **d** Cell cycle was determined by PI staining and FACS analysis. **e** Western  
646 blot analysis of the phosphorylation levels of AKT and ERK proteins.

647 **Figure 3. dCas9-KRAB mRNA-regulating system. a, b** No off-target indels were detectably  
648 induced by CRISPR/Cas9 gene-cutting system at fourteen homologous sites that different from the  
649 on-target sites by up to 4 nt in the human genome. PAM sequences are shown in red and mismatched  
650 nucleotides are shown in green. On: on-target site. OT: off-target site. Cleavage position within the  
651 20-bp target sequences is indicated by red arrow. Error bar indicates S.E.M. (n=3 to 4). **c** Diagram  
652 of knocking down KRAS G12S mutant allele specifically by dCas9-KRAB system. Blue strands:  
653 spacer; green strands: PAM sequence; red strands and star: single-nucleotide missense mutations. **d**  
654 qRT-PCR analysis of KRAS G12S mRNA expression. Error bars represent S.E.M.  $0.01 < P < 0.05$ ,  
655  $(**)$   $0.001 < P < 0.01$ ,  $(***)$   $P < 0.001$ . **e** CCK-8 assay. Cell proliferation was determined by use of  
656 CCK-8 reagents at different timepoints after plating. The relative number of cells of each group with  
657 different treatments was determined by normalizing the optical density at 490 nm of each CCK-8  
658 reaction to the average optical density of the negative control groups.

659 **Figure 4. Antitumor effects of CRISPR-Cas9 and dCas9-KRAB systems in tumor xenograft**  
660 **models.** Error bars represent SEM.  $0.01 < P < 0.05$ ,  $(**)$   $0.001 < P < 0.01$ ,  $(***)$   $P < 0.001$ . Values  
661 represent the mean  $\pm$  S.E.M. (n=8 per group). **a, b** A549 and H2228 tumor-bearing mice were given

662 intra-tumoral injections of PBS or AdV-Cas9 or AdV-Cas9-sgG12S adenoviruses on days 1, 4 and  
663 7. Tumor growth was monitored twice a week post injection until tumor volume > 2000 mm<sup>3</sup>. **c, d**  
664 Weights of tumors removed from euthanized mice after 28 days in A549 tumor-bearing mice, and 7  
665 days in H2228 tumor-bearing mice. **e, f** A549 and H2228 tumor-bearing mice were intra-tumoral  
666 injected of PBS or Lenti-V2 or dCas9-KRAB-sgG12S lentiviruses on day 1, 4 and 7. Tumor growth  
667 was monitored twice a week post injection until tumor volume > 2000 mm<sup>3</sup>. **g, h** Weights of tumors  
668 removed from euthanized mice after 28 days in A549 tumor-bearing mice, and 7 days in H2228  
669 tumor-bearing mice.

670 **Figure 5. Targeting KRAS G12S mutant allele significantly inhibited the expression of KRAS**

671 **mutant *in vivo*.** Error bars represent SEM. (\*) 0.01 < P < 0.05, (\*\*) 0.001 < P < 0.01, (\*\*\*) P < 0.001.

672 **a** Western blot analysis of the expression levels of total and mutant KRAS proteins in A549- and  
673 H2228-engrafted mice treated by CRISPR-Cas9 gene-editing system, respectively. The optical  
674 density analysis was performed from the results in three western blot replicate samples. Tumors  
675 were removed from euthanized mice after 28 days in A549 tumor-bearing mice, and 7 days in H2228  
676 tumor-bearing mice. **b** Western blot analysis of the expression levels of total and mutant KRAS  
677 proteins in A549- and H2228-engrafted mice treated by dCas9-KRAB mRNA-regulating system,  
678 respectively. The optical density analysis was performed from the results in three western blot  
679 replicate samples. Tumors were removed from euthanized mice after 28 days in A549 tumor-bearing  
680 mice, and 7 days in H2228 tumor-bearing mice. **c** Immunohistochemical staining of KRAS and  
681 KRAS (G12S) were performed on tumor sections from A549 cells-engrafted mice treated with  
682 CRISPR-Cas9 gene-editing system. Scale bar: 100 μm. **d** Immunohistochemical staining of KRAS  
683 and KRAS (G12S) were performed on tumor sections from A549 cells-engrafted mice treated with

684 dCas9-KRAB system. Scale bar: 100  $\mu$ m.

685 **Figure 6. Screening of mutation-specific targets by CRISPR nucleases via bioinformatic**  
686 **analysis. a** Top 20 oncogenic mutations discovered from Cosmic database. **b** Distribution of  
687 oncogenic mutations in human tissues. **c** Proportion of different mutation types of the top 20  
688 oncogenic genes. **d** Characteristic of three mostly used CRISPR nucleases, SpCas9, SaCas9 and  
689 LbCpf1. **e** Statistics of mutations that are in seed sequences or PAM sequences. S, sense strand. AS,  
690 anti-sense strand. **f** Proportion of 31555 SNV oncogenic mutations that can be targeted by CRISPR  
691 nucleases. S, sense strand. AS, anti-sense strand.

## 692 **Additional file**

### 693 **Additional file 1:**

694 **Figure S1.** Maps of pX330 vectors. **Figure S2.** Editing efficiency and inhibition of tumor cells of  
695 AdV-Cas9-sgG12S adenovirus. **Figure S3.** Tumor weights of xenograft mice treated with CRISPR  
696 system. **Figure S4.** PAM analysis of three CRISPR nucleases. **Table S1.** List of PCR primers used  
697 in targeted deep sequencing.

698

699 **Figure S1. Maps of pX330 vectors**, including pX330-U6-Chimeric blank vector and pX330-U6-  
700 sgRNA expressing vector.

701 **Figure S2. Editing efficiency and inhibition of tumor cells of AdV-Cas9-sgG12S adenovirus. a**  
702 Maps of adenoviral vectors, including AdV-Cas9 blank vector and sgG12S guide RNA expressing  
703 vector AdV-Cas9-sgG12S. **b** Gene editing efficiency and specificity of AdV-Cas9-sgG12S  
704 adenovirus were confirmed by sanger sequencing in A549 and H2228 cells. **c** Gene editing

705 efficiency and specificity of AdV-Cas9-sgG12S adenovirus were confirmed by sanger sequencing  
706 in A549 and H2228 cells. **d** CCK-8 assay. Cell proliferation was accessed by using CCK-8 reagents  
707 at different timepoints after plating. The number of cells in cultures with different treatments was  
708 determined by the optical density at 490 nm.

709 **Figure S3. Tumor weights of xenograft mice treated with CRISPR system.** **a** Body weights of  
710 euthanized A549 tumor-bearing mice treated with PBS, AdV-Cas9 and AdV-Cas9-sgG12S on 28  
711 days post adenoviral injection, and **b** Body weights of euthanized H2228 tumor-bearing mice on 7  
712 days post adenoviral injection of PBS, AdV-Cas9 and AdV-Cas9-sgG12S. **c** Body weights of  
713 euthanized A549 tumor-bearing mice on 28 days post lentiviral injection of PBS, V2 and dCas9-  
714 KRAB-sgG12S, and **d** Body weights of euthanized H2228 tumor-bearing mice on 7 days post  
715 lentiviral injection of PBS, V2 and dCas9-KRAB-sgG12S.

716 **Figure S4. PAM analysis of three CRISPR nucleases.** **a** Top, appearance of SpCas9 PAM  
717 sequence in the sense strand of oncogenic mutations. Only when the mutation occurs in the seed  
718 sequence or PAM sequence, it can be specifically targeted. But if the mutation occurs in the N of  
719 PAM NGG sequence, it can't be targeted specifically. This situation is considered meaningless. M,  
720 mutation, in red. Green arrow, the direction of PAM shift. Bottom, appearance of SpCas9 PAM  
721 sequence in the anti-sense strand of oncogenic mutations. **b** PAM analysis of SaCas9 in the sense  
722 and anti-sense strands of oncogenic mutations. PAM sequence of SaCas9 is NGRRN, if the mutation  
723 occurs at any N of the PAM sequence, this situation is meaningless. M, mutation, in red. Green  
724 arrow, the direction of PAM shift. **c** PAM analysis of LbCpf1 in the sense and anti-sense strands of  
725 oncogenic mutations. PAM sequence of LbCpf1 is TTTV, V is all but T. If the original V is T, then  
726 the mutation of V could lead to the specific targeting. M, mutation, in red. Green arrow, the direction

727 of PAM shift.

728 **Table S1. List of PCR primers used in targeted deep sequencing.**

Figure 1

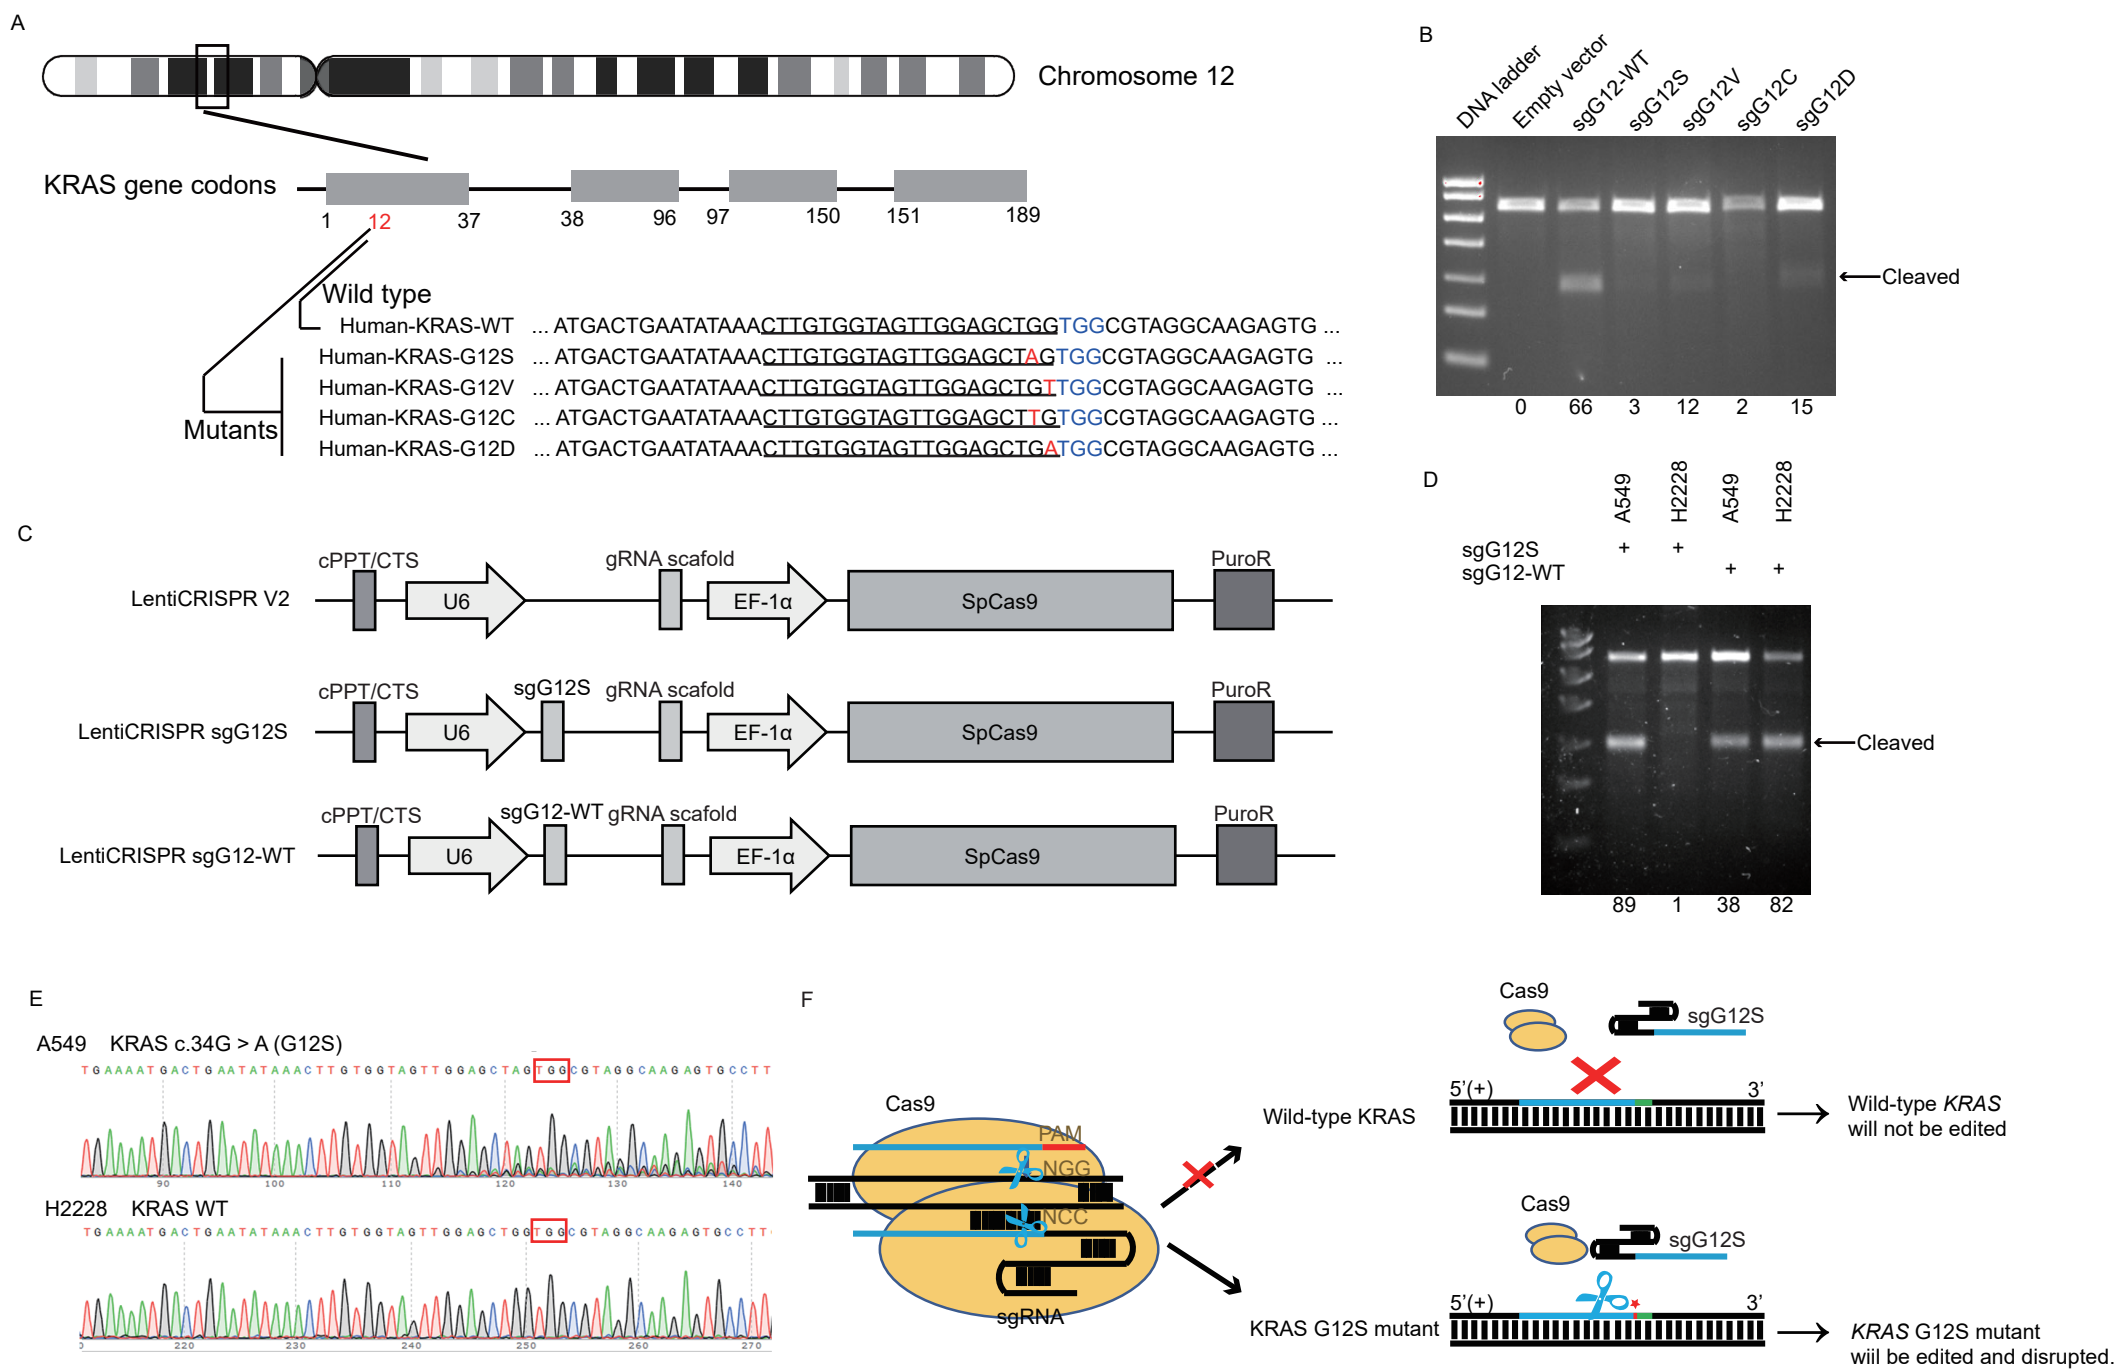

Fig1. Oncogenic KRAS is a pan-cancer target for Cas9. <https://doi.org/10.1101/807578>; this version posted October 17, 2019. The copyright holder for this preprint (which was not certified by peer review) is the author/funder, who has granted bioRxiv a license to display the preprint in perpetuity. It is made available under aCC-BY-NC-ND 4.0 International license.

Figure 2

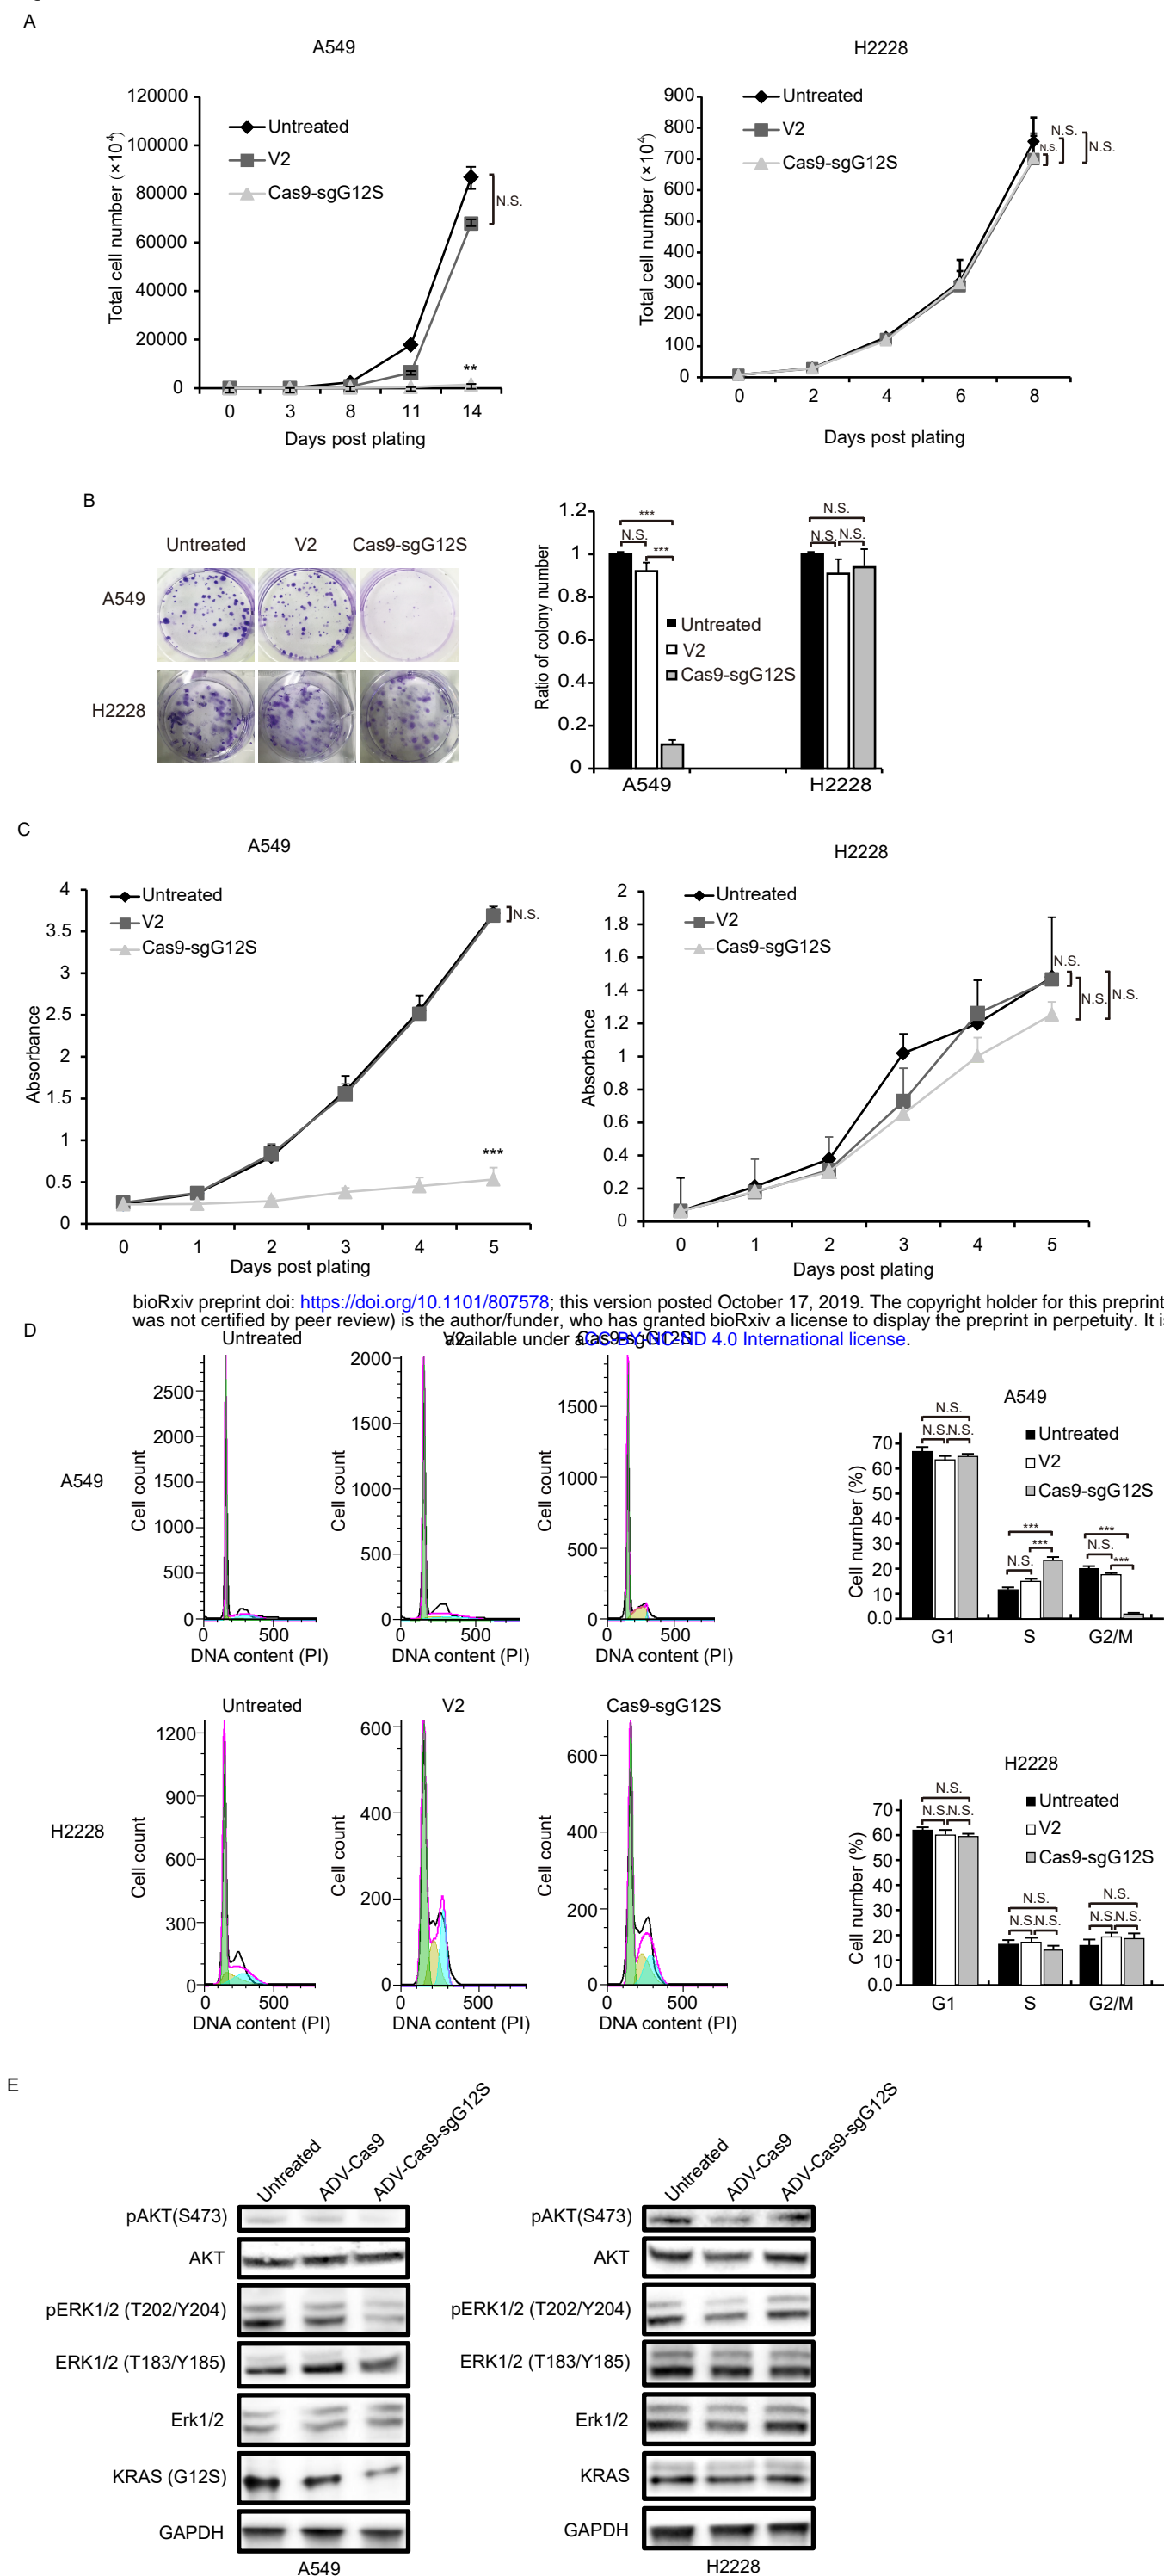

Fig.2 sgRNA targeting at KRAS G12S specially suppresses proliferation of tumor cells and arrest them at S phase.

Figure 3

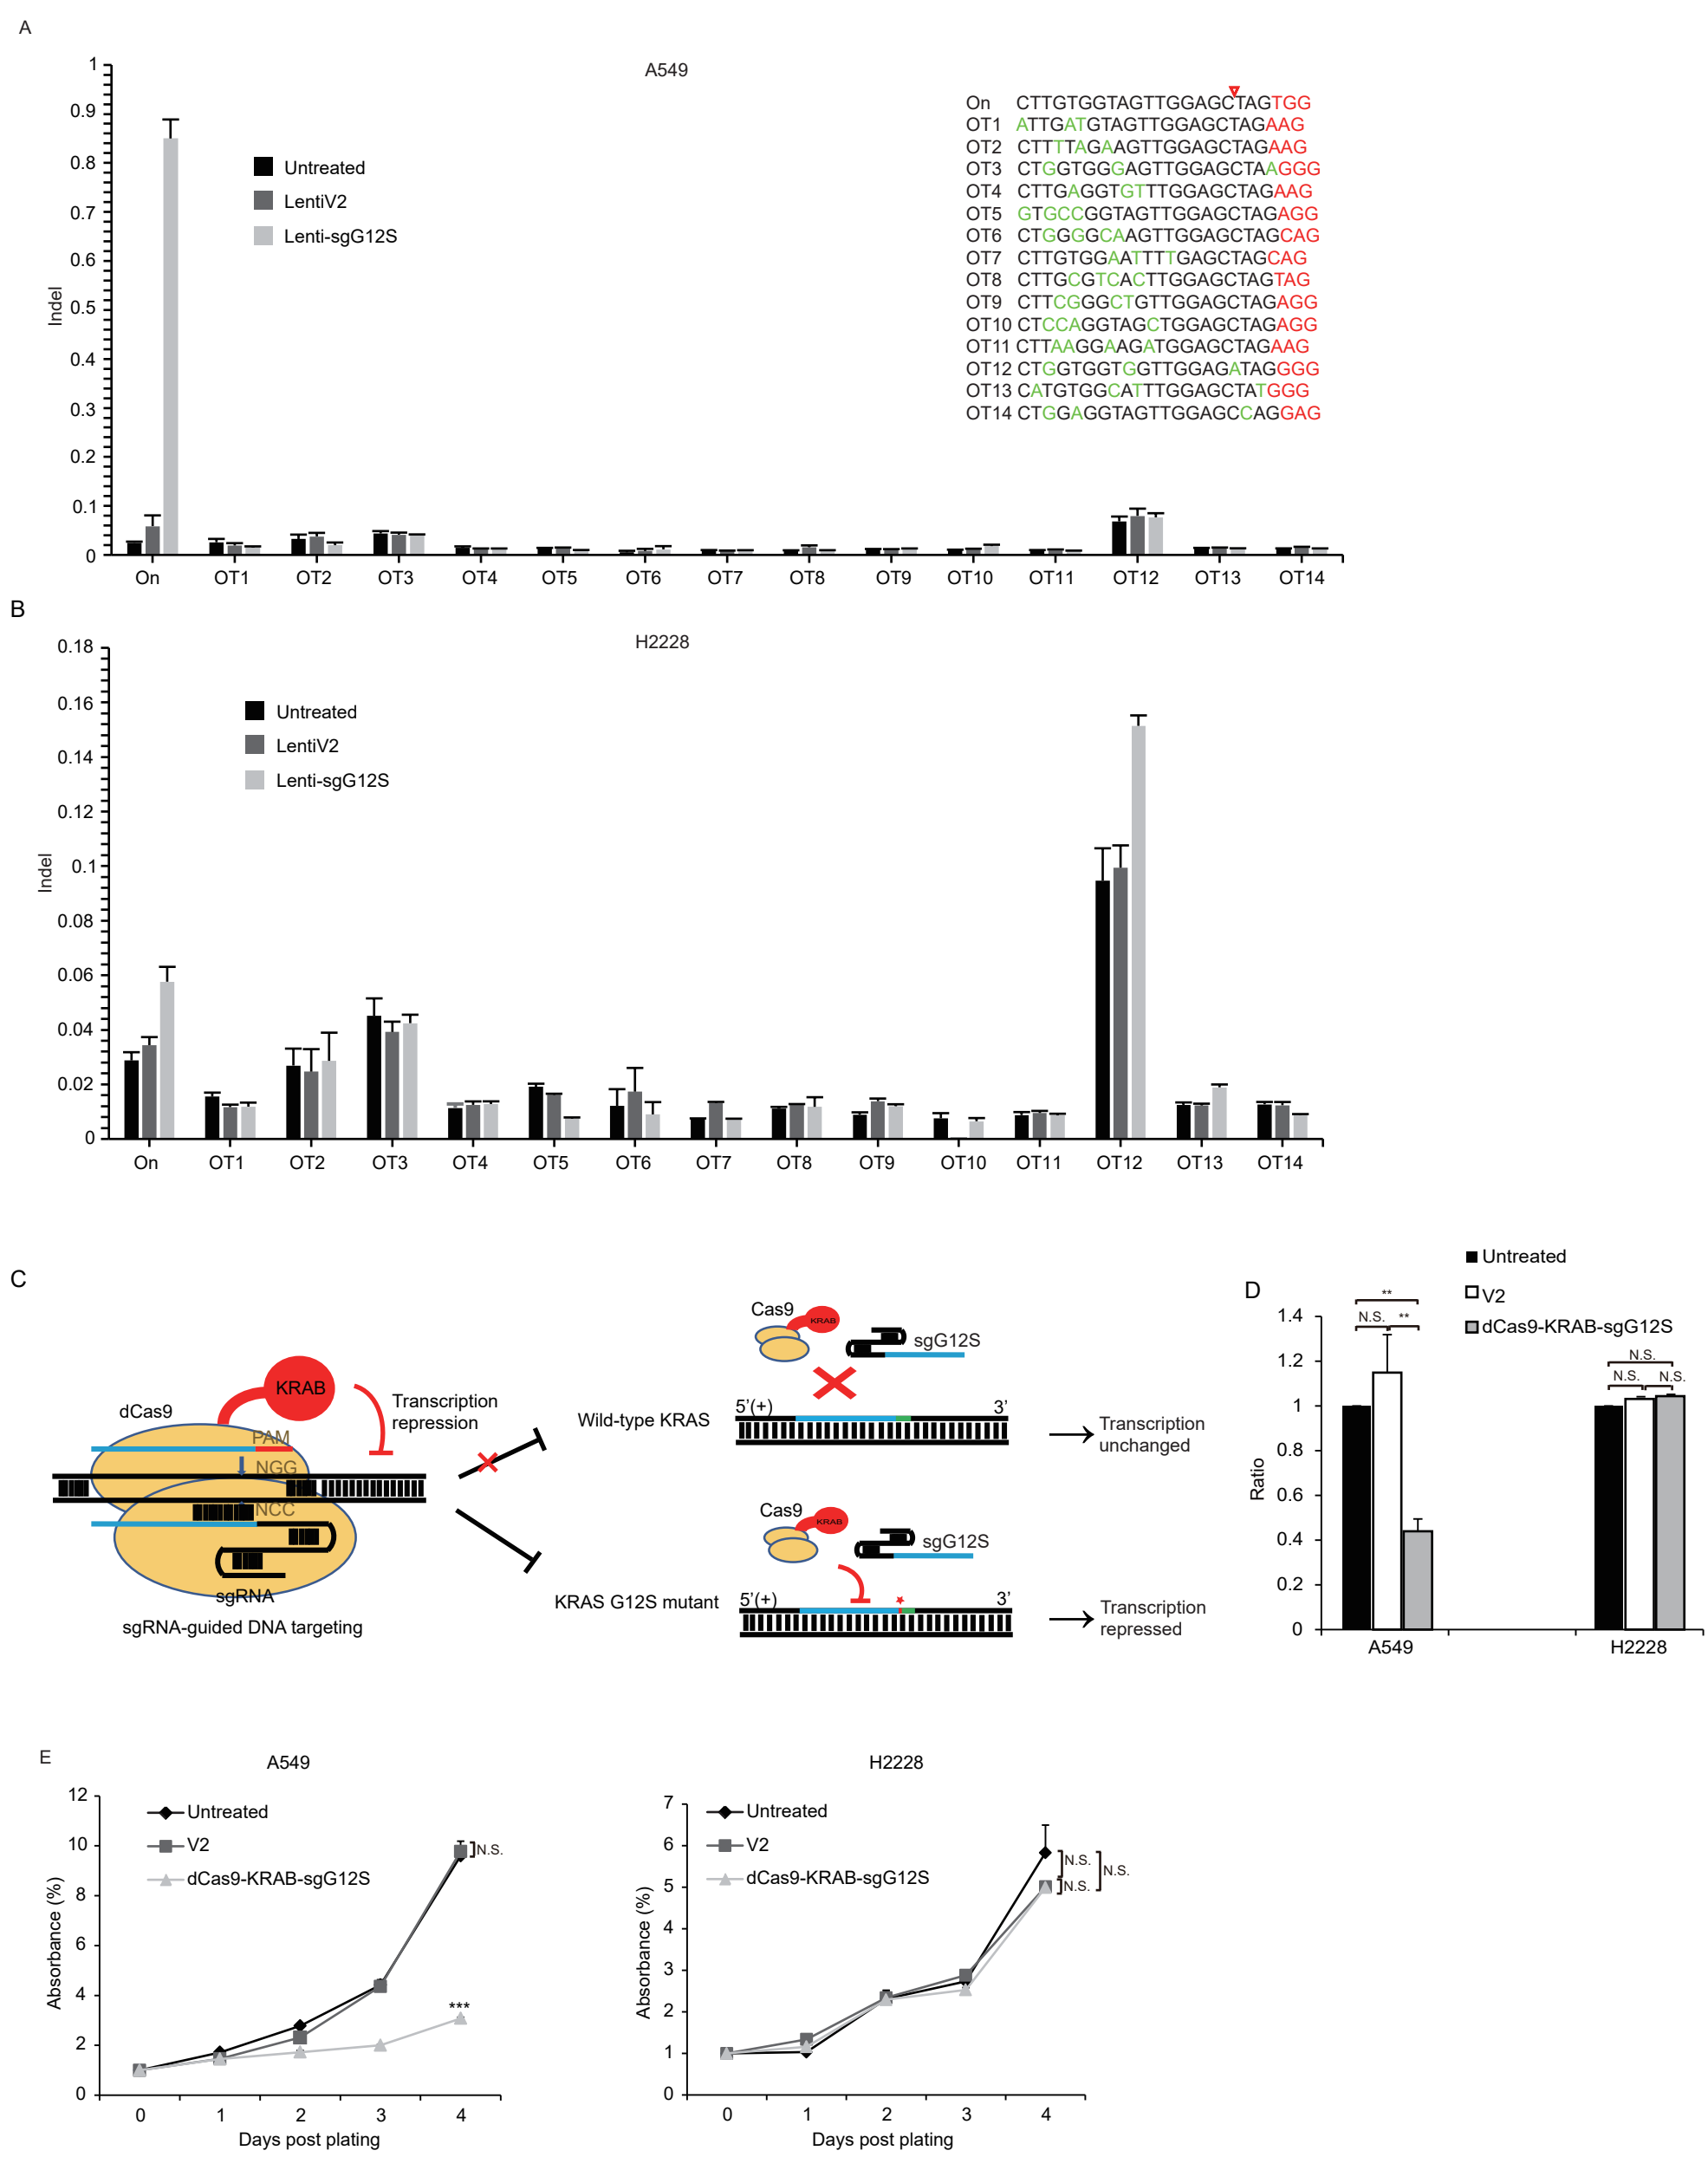



Figure 5

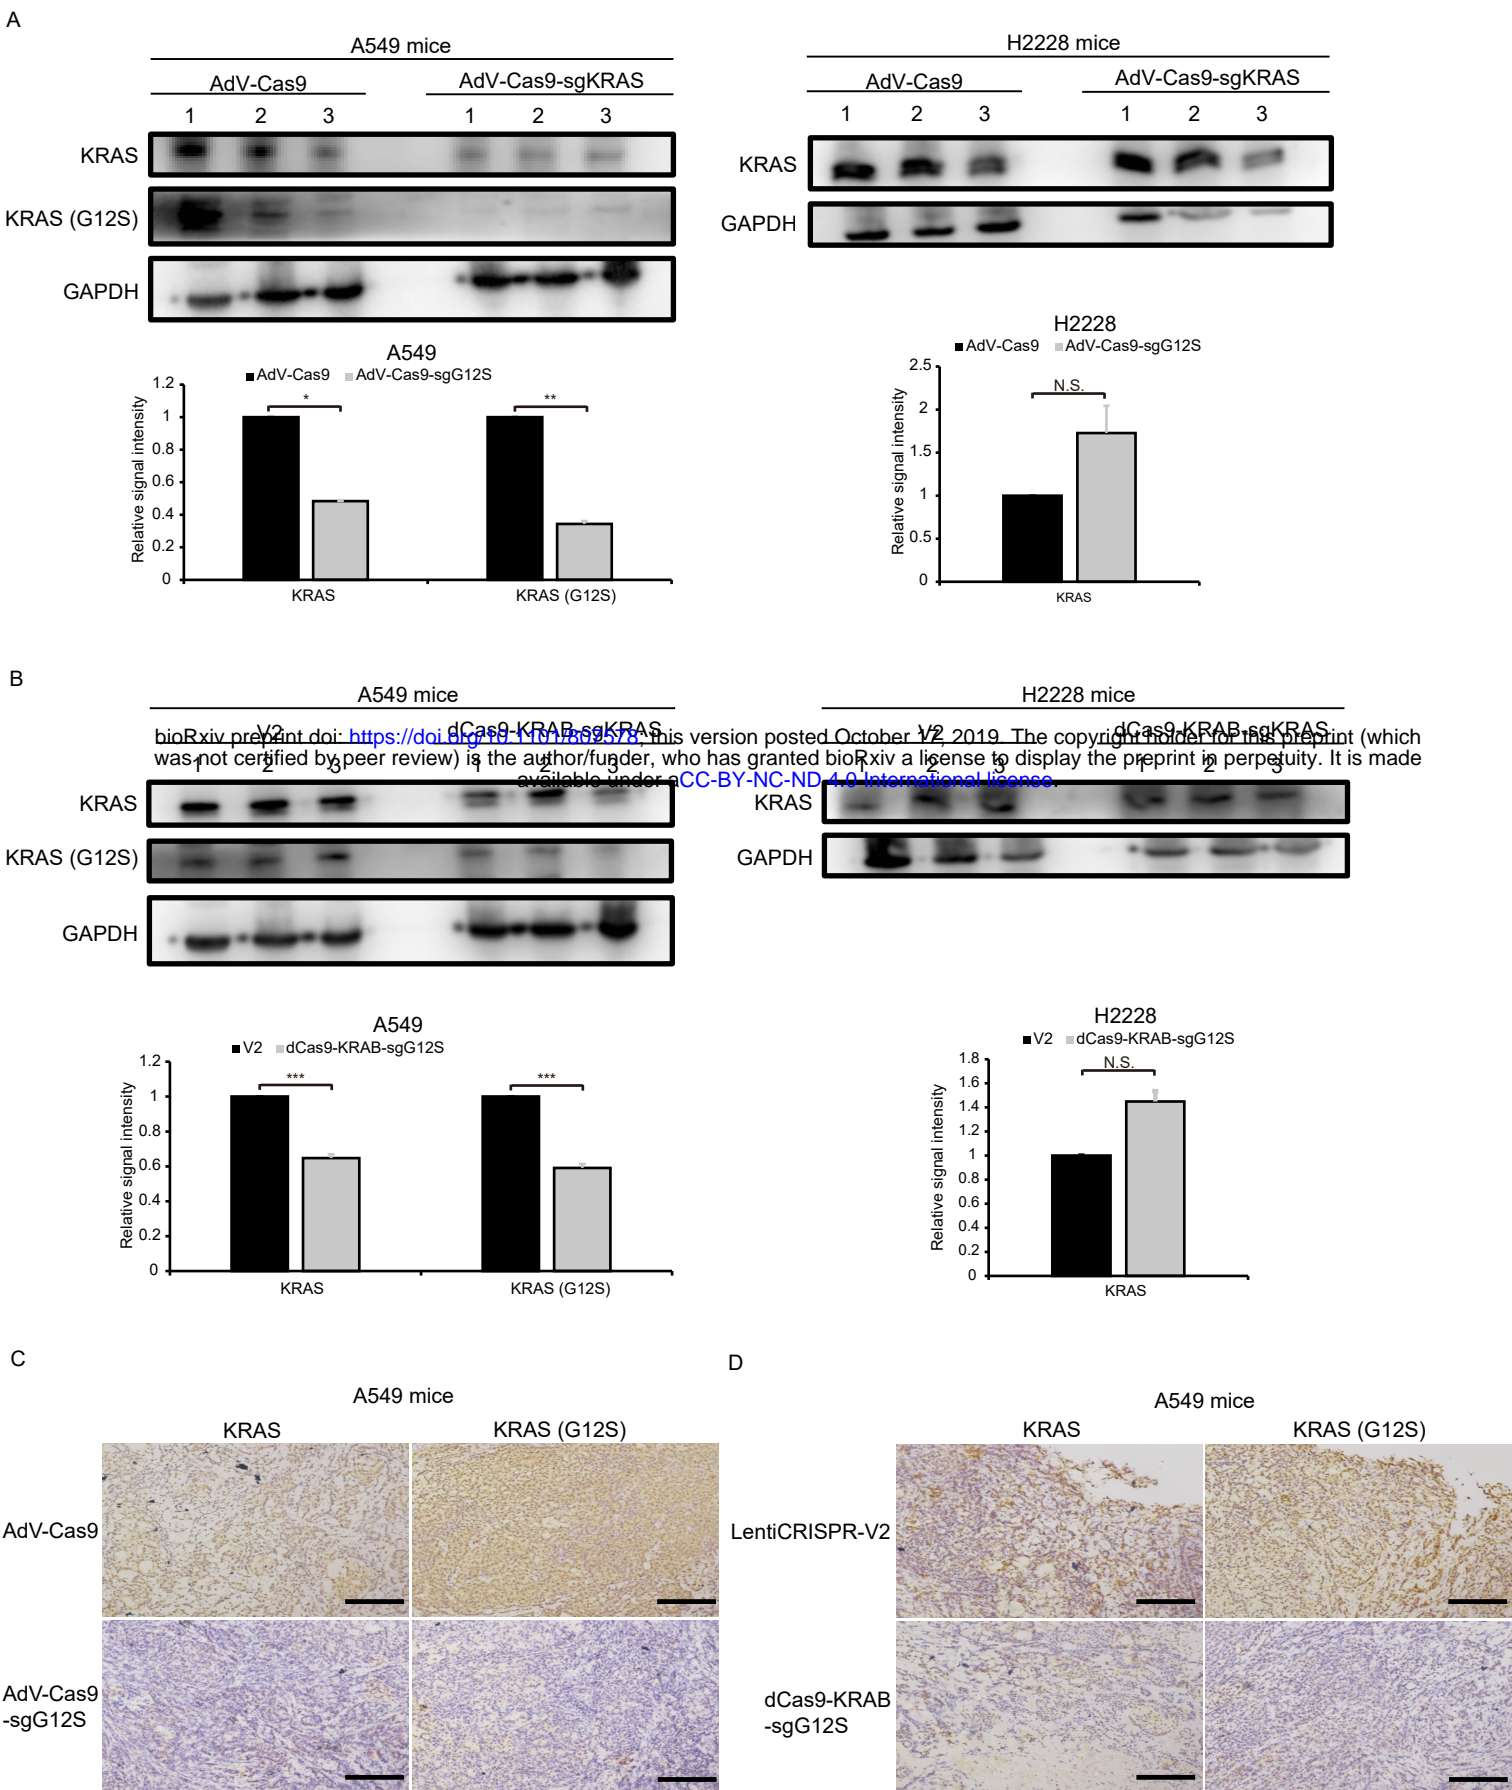

bioRxiv preprint doi: <https://doi.org/10.1101/2019.10.17.325578>; this version posted October 17, 2019. The copyright holder for this preprint (which was not certified by peer review) is the author/funder, who has granted bioRxiv a license to display the preprint in perpetuity. It is made available under aCC-BY-NC-ND 4.0 International license.

A

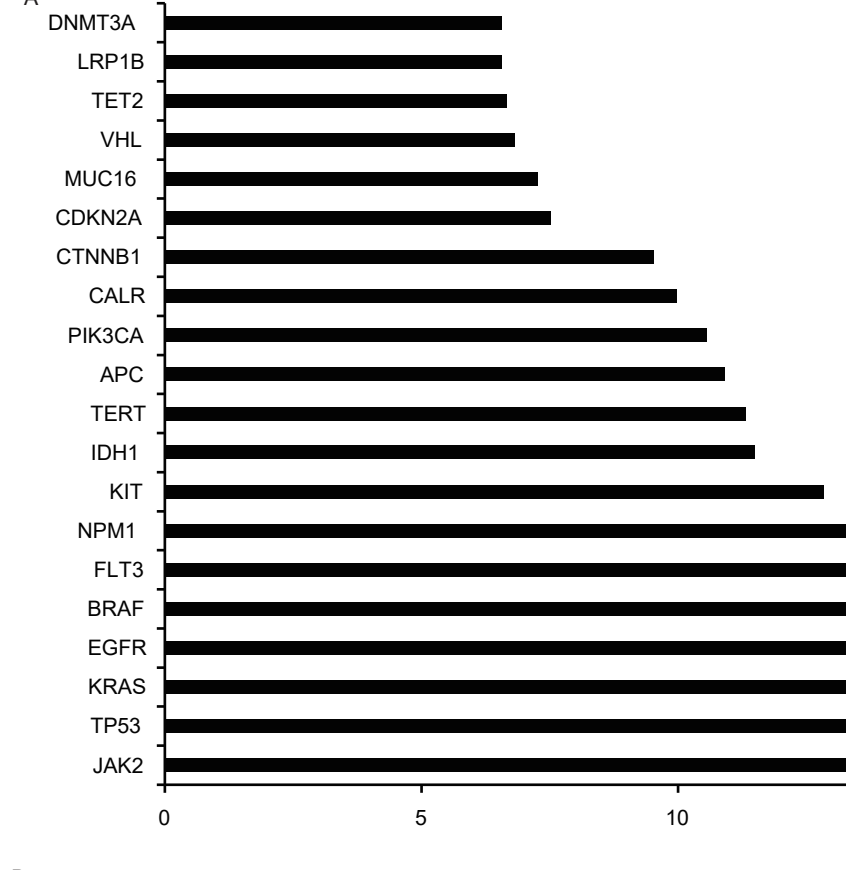

B

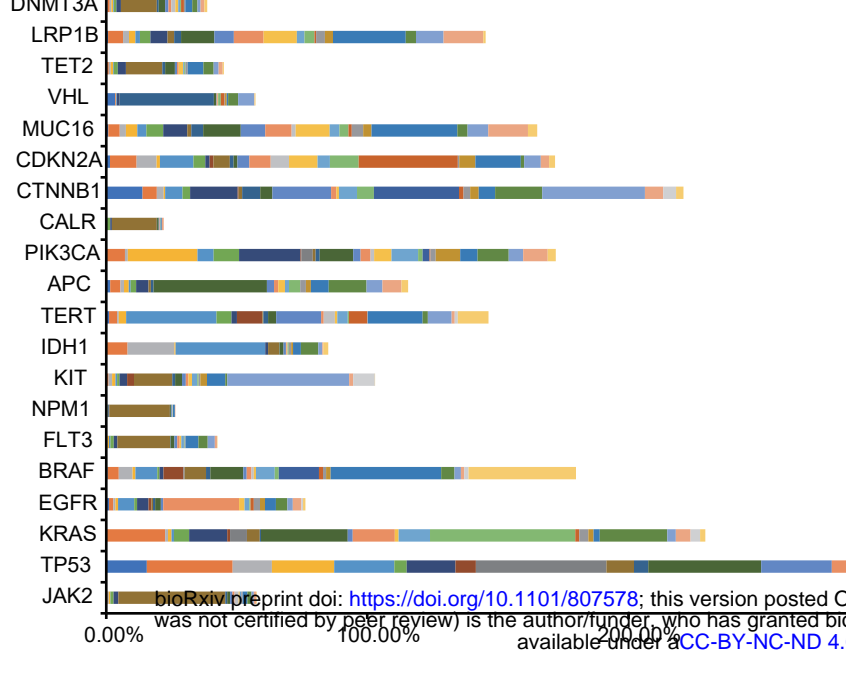

C

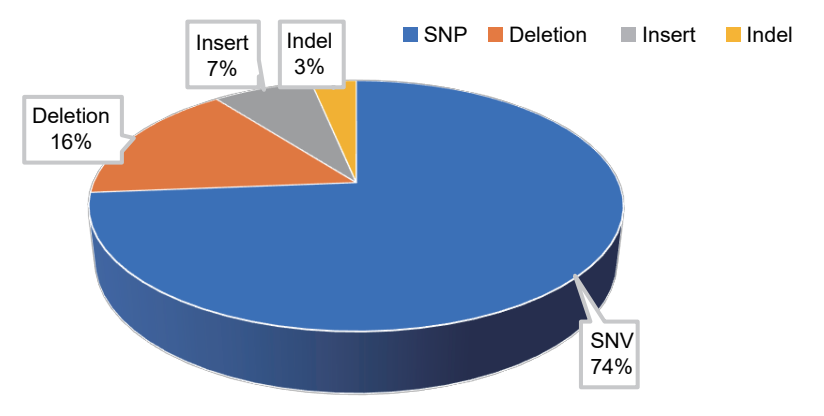

D

| CRISPR Nucleases | Organism isolated from           | PAM sequence (5' to 3') | gRNA length (nt) | Seed sequence (nt) |
|------------------|----------------------------------|-------------------------|------------------|--------------------|
| SpCas9           | <i>Streptococcus pyogenes</i>    | NGG                     | 20               | 8-12               |
| SaCas9           | <i>Staphylococcus aureus</i>     | NGRRN                   | 22               | 10-12              |
| LbCpf1           | <i>Lachnospiraceae bacterium</i> | TTTV                    | 20               | 5-8                |

N: All  
V: All but T;  
R=A or G

E

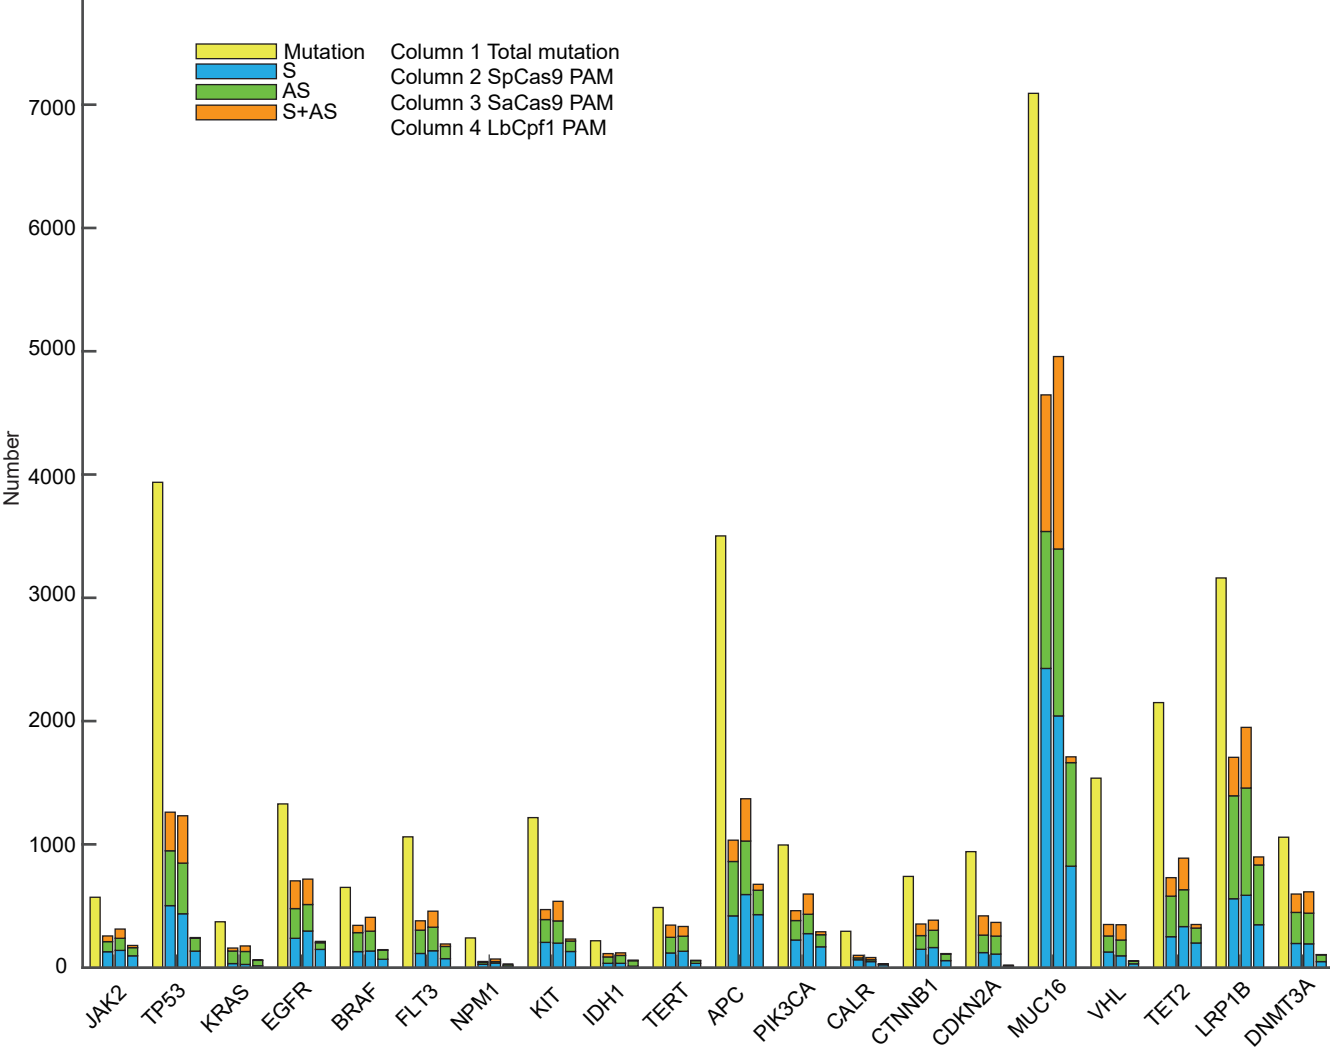

F

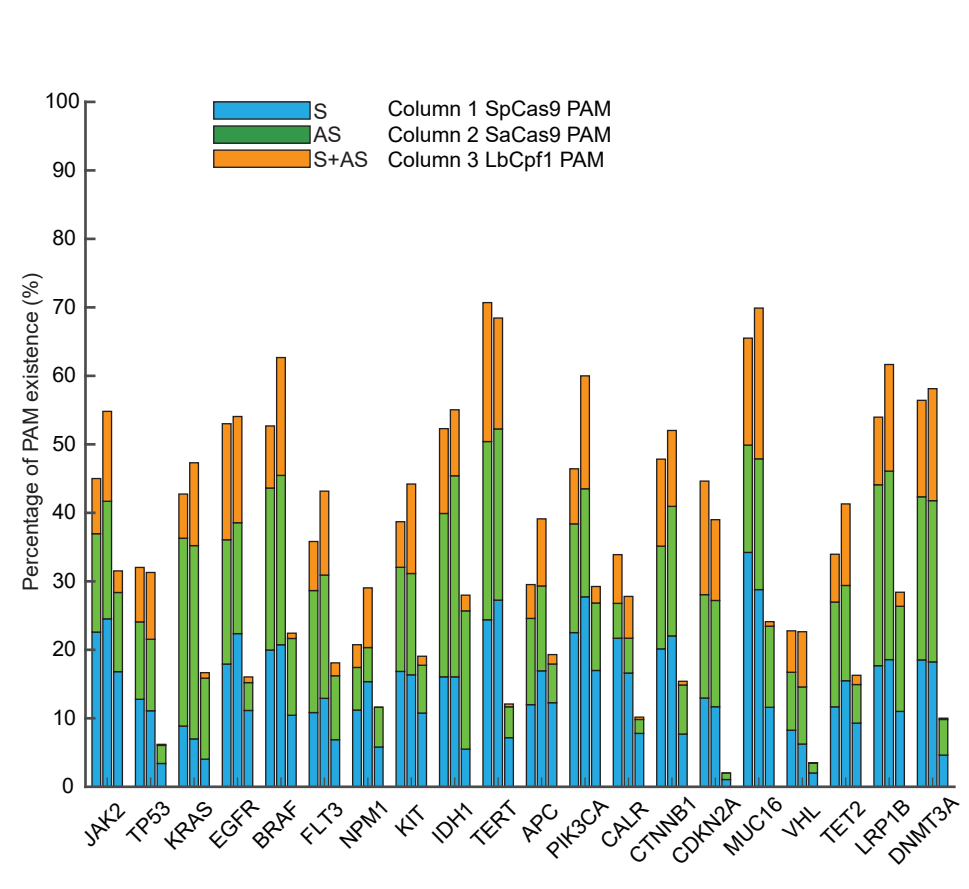

Source: https://www.biorxiv.org/content/10.1101/807578v1.full.pdf
